1 **A baseline for the genetic stock identification of Atlantic herring, *Clupea harengus*, in ICES**

2 **Divisions 6.a, 7.b–c**

3 Edward D. Farrell<sup>1,7</sup>, Leif Andersson<sup>2,3,4</sup>, Dorte Bekkevold<sup>5</sup>, Neil Campbell<sup>6</sup>, Jens Carlsson<sup>7</sup>, Maurice W.  
4 Clarke<sup>8</sup>, Afra Egan<sup>8</sup>, Arild Folkvord<sup>9</sup>, Michaël Gras<sup>8,10</sup>, Susan Mærsk Lusseau<sup>6,11</sup>, Steven Mackinson<sup>12</sup>,  
5 Cormac Nolan<sup>8</sup>, Steven O’Connell<sup>6</sup>, Michael O’Malley<sup>8</sup>, Martin Pastoors<sup>13</sup>, Mats E. Pettersson<sup>2</sup> and  
6 Emma White<sup>8</sup>

7 <sup>1</sup> EDF Scientific Limited, Rathaha, Ladysbridge, Cork, Ireland.

8 <sup>2</sup> Department of Medical Biochemistry and Microbiology, Uppsala University, Uppsala, Sweden.

9 <sup>3</sup> Department of Veterinary Integrative Biosciences, Texas A&M University, College Station, USA.

10 <sup>4</sup> Department of Animal Breeding and Genetics, Swedish University of Agricultural Sciences, Uppsala,  
11 Sweden.

12 <sup>5</sup> National Institute of Aquatic Resources, Technical University of Denmark, Silkeborg, Denmark.

13 <sup>6</sup> Marine Scotland Science, 375 Victoria Rd, Aberdeen AB11 9DB, Scotland.

14 <sup>7</sup> Area 52 Research Group, School of Biology and Environmental Science/Earth Institute, Science Centre  
15 West, University College Dublin, Dublin, Ireland.

16 <sup>8</sup> Marine Institute, Rinville, Oranmore, Co. Galway, Ireland.

17 <sup>9</sup> Department of Biological Sciences, University of Bergen, Bergen, Norway.

18 <sup>10</sup> European Commission, Joint Research Centre (JRC), Ispra, Italy.

19 <sup>11</sup> National Institute of Aquatic Resources, Willemoesvej 2, Hovedbygning, 067, 9850 Hirtshals,  
20 Denmark.

21 <sup>12</sup> Scottish Pelagic Fishermen’s Association, Heritage House, 135-139 Shore Street, Fraserburgh,  
22 Aberdeenshire, Scotland.

23 <sup>13</sup> Pelagic Freezer-trawler Association, Louis Braillelaan 80, 2719 EK Zoetermeer, The Netherlands.

24 Corresponding Author: [edward.d.farrell@gmail.com](mailto:edward.d.farrell@gmail.com), ORCID ID: [orcid.org/0000-0002-0070-9154](https://orcid.org/0000-0002-0070-9154)

25

26 **Abstract**

27 Atlantic herring in ICES Divisions 6.a, 7.b-c comprises at least three populations, distinguished by  
28 temporal and spatial differences in spawning, which have until recently been managed as two stocks  
29 defined by geographic delineators. Outside of spawning the populations form mixed aggregations,  
30 which are the subject of acoustic surveys. The inability to distinguish the populations has prevented  
31 the development of separate survey indices and separate stock assessments. A panel of 45 SNPs,  
32 derived from whole genome sequencing, were used to genotype 3,480 baseline spawning samples  
33 (2014-2021). A temporally stable baseline comprising 2,316 herring from populations known to  
34 inhabit Division 6.a was used to develop a genetic assignment method, with a self-assignment  
35 accuracy >90%. The long-term temporal stability of the assignment model was validated by assigning  
36 archive (2003-2004) baseline samples (270 individuals) with a high level of accuracy. Assignment of  
37 non-baseline samples (1,514 individuals) from Division 6.a, 7.b-c indicated previously unrecognised  
38 levels of mixing of populations outside of the spawning season. The genetic markers and assignment  
39 models presented constitute a ‘toolbox’ that can be used for the assignment of herring caught in  
40 mixed survey and commercial catches in Division 6.a into their population of origin with a high level  
41 of accuracy.

42 **Keywords:** fisheries, management, genetic assignment, stock identification, Northwest herring, West  
43 of Scotland Herring.

## 44 **Introduction**

45 Fish stock identification has been an important prerequisite for fisheries stock assessment throughout  
46 its history (Cadrin & Secor, 2009). However, the central fundamental weakness that remains in many  
47 existing stock assessments is the inaccurate recognition, definition and delineation of 'stocks' for data  
48 collection and aggregation. Traditionally, exploited stocks have been defined, assessed and managed  
49 according to geographical and political features or regions. Such is the case in the northeast Atlantic  
50 (FAO Major Fishing Area 27) where the European Union (EU) defines the term 'stock' as 'a marine  
51 biological resource that occurs in a given management area' and delineates and names stocks using  
52 ICES (International Council for Exploration of the Sea) Statistical Areas (Anon, 2014). As more  
53 information becomes available, it is evident that the temporal and spatial distributions of most  
54 fisheries resources are not aligned to these artificial divisions (Kerr *et al.*, 2016) and that biological  
55 populations are more dynamic and complex (Reiss *et al.*, 2009; Stephenson, 2002).

56 Whilst delineation by predefined area may be convenient for management and regulation purposes,  
57 accurately assessing the status, biomass and sustainable exploitation rates of mixed 'stocks' is  
58 inherently difficult if not impossible, as they do not correspond to biological units. Fisheries dependent  
59 and independent data may be confounded, which may mask changes in the abundance of individual  
60 populations and lead to biased estimates of population abundance and overexploitation of smaller  
61 populations (Hintzen *et al.*, 2015). It is thus critical to identify the underlying population structure of  
62 fisheries resources in order to identify the appropriate level at which to aggregate or segregate data  
63 for defining assessment and management units. It is also important to be able to assign individuals in  
64 mixed survey and commercial catches to the population or assessment unit to which they belong  
65 (Casey *et al.*, 2016; Hintzen *et al.*, 2015) in order to ensure the validity of data for inclusion in stock  
66 specific assessments. An ideal method of stock identification should be reproducible among  
67 laboratories and enable monitoring of the spatial and temporal integrity of a stock.

68 There is a long history of research into the characterisation of Atlantic herring (*Clupea harengus*  
69 Linnaeus, 1758) populations using a wide variety of different techniques, including life-history  
70 characteristics, morphometric and meristic characters of whole bodies and otoliths, parasite analyses,  
71 physical tagging and genetic approaches (see Farrell *et al.*, 2021; Hatfield *et al.*, 2005; McQuinn, 1997).  
72 Whilst many of the approaches have purported to offer reliable methods of discrimination between  
73 different populations, the reality is that confusion surrounding the population structure in herring  
74 across its distribution has persisted. This has prevented the identification of populations and  
75 hampered the delineation of stocks in many cases, for instance in the waters around Ireland and  
76 Britain where ICES currently assesses five herring stocks. The North Sea autumn spawning stock (ICES  
77 subarea 4, Divisions 3.a and 7.d.) is the most abundant and well-studied (Saville and Bailey, 1980) and  
78 is considered to be a complex of four spawning components (the autumn spawning Shetland/Orkney,  
79 Buchan, Banks components and the winter spawning Downs component), which are largely managed  
80 as one unit (Dickey-Collas *et al.*, 2010; Simmonds, 2009). The definition of the western herring stocks  
81 has changed considerably over the last five decades (see Farrell *et al.*, 2021; ICES, 2015) and the main  
82 stocks are currently recognised as: 6.a.N (*6aN\_Aut*); 6.a.S, 7.b and 7.c (*6aS*); Division 7.a North of  
83 52°30'N (Irish Sea/*IS*); Divisions 7.a South of 52°30'N, 7.g, 7.h, 7.j and 7.k (Irish Sea, Celtic Sea, and  
84 southwest of Ireland, *CS*) (Figure 1; ICES, 2014). The *6aN\_Aut* herring spawn in Autumn (Sept/Oct) off  
85 Cape Wrath on the north coast of Scotland, the *6aS* herring spawn in winter (Nov-Feb) primarily off  
86 the coast of Donegal in the northwest of Ireland, *IS* herring spawn in Autumn (Sept/Oct) mainly on the  
87 Douglas Bank east of the Isle of Man in the Irish Sea and Celtic Sea herring spawn in winter (Nov-Feb)  
88 off the south coast of Ireland. Several groups of spring spawning (Feb-May) herring are also known to  
89 occur in the Minch (*6aN\_Sp*), Clyde and Milford Haven, though these are not currently assessed and  
90 are believed to be small populations (see review in Farrell *et al.*, 2021). Other autumn/winter  
91 spawning herring groups are also found in the western English Channel and Bristol Channel (ICES  
92 Divisions 7.e and 7.f, respectively), though no assessment is made of these groups and there are no  
93 management measures in place.

94 The stock divisions for herring assessments and management around Ireland and Britain are largely  
95 based on the recognition of temporal and spatial differences in spawning season and grounds and are  
96 believed to broadly align with biological population structure (ICES, 2015). Though some geographic  
97 and political boundaries are still in place, the mixing across these boundaries is unclear. This is evident  
98 in ICES Division 6.a, where the *6aN\_Aut* stock is separated from the North Sea autumn spawning stock  
99 by the 4° west line of longitude, despite there being no biological evidence that these represent  
100 different populations (see review in Farrell *et al.*, 2021). Within Division 6.a the herring are subdivided  
101 into two stocks (Figure 1) by the 56° north line of latitude and 7° west line of longitude (ICES, 1982).  
102 Herring caught or surveyed to the north or east of this boundary (excluding the Clyde area) are  
103 included as part of the *6aN\_Aut* stock regardless of their population of origin or their spawning time.  
104 This includes herring caught in Lough Foyle in NW Ireland, whose waters are bisected by the 7° west  
105 line. Most of Lough Foyle is west of this line, however the mouth of Lough Foyle is east of this line and  
106 hence the herring in the whole Lough are considered to be part of the *6aN\_Aut* stock despite having  
107 no affinity to this population. Herring caught to the south and west of the 56° and 7° lines are  
108 considered to be part of the *6aS* stock in combination with herring in Divisions 7.b and 7.c. Adult  
109 herring from different populations, both within Division 6.a (*6aN\_Aut*, *6aS*, *6aN\_Sp*) and possibly from  
110 adjacent populations (*IS* and *CS*) are believed to form mixed aggregations on common feeding grounds  
111 in Division 6.a during summer (Hatfield *et al.*, 2005). It is during this time that they are surveyed by  
112 the annual Malin Shelf Herring Acoustic Survey (MSHAS), part of the internationally coordinated  
113 Herring Acoustic Survey (HERAS), which is the primary tuning index used in the stock assessments of  
114 Division 6.a herring. The inability to assign herring catches from the MSHAS into their population of  
115 origin prevents the development of separate indices of abundance for the populations in Division 6.a,  
116 therefore ICES has conducted a combined assessment of these populations since 2015 (ICES, 2015),  
117 which provides combined management advice. Combined management of separate stocks can only  
118 be precautionary if the two stocks are of similar size and are homogeneously distributed together in

119 commercial catches. If these conditions are not met, uncertainty of the status of each of the individual  
120 stocks increases, as does the risk that one stock may sustain higher fishing mortality than the other.

121 Genetic assignment methods, which compare genetic data from individuals to genetic profiles of  
122 reference samples from potential source populations to determine population of origin (Manel *et al.*,  
123 2005), offer the potential to resolve these issues. However, the incorporation of genetic assignment  
124 methods into regular fisheries data collection, assessment and management has been slow  
125 (Bernatchez *et al.*, 2017; Reiss *et al.*, 2009; Waples *et al.*, 2008), as many existing genetic studies have  
126 been hampered by high cost, inadequate sampling coverage, low numbers of suitable molecular  
127 markers and low power to detect genetic structure. The advent of high-throughput sequencing (HTS)  
128 technologies fundamentally changed the way in which genetic sequence data are generated (see  
129 Hemmer-Hansen *et al.*, 2014; Davey *et al.*, 2010). It is now possible to generate large genomic data  
130 sets for non-model species, which facilitate the identification of genetic loci with high discriminatory  
131 power for resolving specific population differentiation questions (Martínez Barrio *et al.*, 2016; Nielsen  
132 *et al.*, 2012). There has also been a shift toward the analysis of sequence variation of functional,  
133 adaptive significance rather than just neutral DNA sequence variation (Mariani & Bekkevold, 2013).  
134 This approach focuses on identifying adaptive markers that are under diversifying selection and may  
135 reflect distinctive features of local populations (Nielsen *et al.*, 2012). Small panels of high-graded  
136 markers may be selected to develop efficient and cost-effective genetic assignment tools for informing  
137 marine fisheries assessment and management (Hemmer-Hansen *et al.*, 2018).

138 Assignment methods that attempt to solve classification problems rely on computing a discriminant  
139 function based on samples from potential source populations and then classify unknown individuals  
140 to the group with the highest discriminant score (Manel *et al.*, 2005). Genetic assignment methods  
141 have traditionally relied on using the genotypic frequency distribution under the assumption of  
142 Hardy–Weinberg equilibrium (HWE) and linkage equilibrium in each source population as their  
143 discriminant function (Manel *et al.*, 2005). These genetic assignment methods can be broadly divided

144 into Bayesian (Rannala and Mountain, 1997), frequency (Paetkau *et al.*, 1995) and distance based  
145 (Cornuet *et al.*, 1999) methods (Hauser *et al.*, 2006). The underlying assumptions of the methods are  
146 quite similar although the distance-based methods may be less sensitive to violations of population  
147 genetic expectations such as HWE and linkage equilibrium (Cornuet *et al.*, 1999). These methods are  
148 commonly implemented in the software GeneClass2 (Piry *et al.*, 2004). In the absence of baseline data  
149 to guide classification, Bayesian clustering methods may be used to delineate clusters of individuals  
150 based on their multi-locus genotypes and assign individuals to their individual clusters (Manel *et al.*,  
151 2005). However, these Bayesian clustering analyses such as that implemented in the software  
152 *Structure* (Pritchard *et al.*, 2000) are also constrained by the underlying assumptions of HWE and  
153 linkage equilibrium. Multivariate analysis has several advantages over other classical approaches used  
154 in population genetics and genetic assignment, the foremost of which is that they do not require the  
155 assumptions of HWE or linkage equilibrium (Jombart *et al.*, 2009). Multivariate approaches are  
156 particularly suited to solving classification problems when used in the form of supervised machine  
157 learning (SML) approaches. SML is concerned with predicting the value of a response label/category  
158 on the basis of the input variables/features (Schrider and Kern, 2018). When empirical data are  
159 available, SML trains an algorithm based on a training set of the labelled data, which can then be used  
160 to predict the category of unknown data. Support Vector Machines (SVM) are a set of SML methods  
161 that can be used for classification problems. The objective of SVM algorithms is to find a hyperplane  
162 in an N-dimensional space (N - the number of features) that distinctly classifies the data point (see  
163 James *et al.*, 2013). SVM models can also be used to classify non-linear data through use of non-linear  
164 kernels (James *et al.*, 2013) and can be optimised by adjusting parameters, including cost and gamma,  
165 which control the stringency of the boundary and the influence of single training datapoints,  
166 respectively. The *R* package *assignPOP* (Chen *et al.*, 2018) has recently made the use of SVM models  
167 for assignment more accessible and also allows for the integration of genetic and non-genetic data  
168 within the same model, which is an advantage in many stock identification studies which also collect  
169 morphometric data.

170 Recent studies utilising Whole Genome Sequencing (WGS) approaches, have comprehensively  
171 clarified the genetic population structure of Atlantic herring across its distribution and have illustrated  
172 that herring populations show strong population structure inferred to be associated with a high level  
173 of local ecological adaptation (Han *et al.*, 2020; Lamichhaney *et al.*, 2017; Martinez Barrio *et al.*, 2016).  
174 Genetic markers associated with loci under selection have also been proven to provide a significantly  
175 better resolution to distinguish population structure than neutral genetic markers (Han *et al.*, 2020).  
176 From the circa 10 million Single Nucleotide Polymorphisms (SNPs) identified by Han *et al.* (2020) a  
177 small subset of circa 800 SNPs, associated with ecological adaptation to different geographic areas  
178 and spawning conditions, were shown to be able to discriminate all the sampled populations of herring  
179 from across the species distribution. The populations around Ireland and Britain are the southernmost  
180 ecomorphs of herring in the Northeast Atlantic and are genetically distinct from the other adjacent  
181 Northeast Atlantic herring populations, including Norwegian Spring Spawning herring to the north and  
182 the Baltic herring to the east, from which they can be discriminated with a small subset of 12  
183 independent loci (Han *et al.*, 2020). The populations sampled around Ireland and Britain could be  
184 further subdivided into four main groups: the spring spawning herring from the Minch (*6aN\_Sp*) and  
185 the Clyde; the *6aN\_Aut* and North Sea autumn spawning herring, which were indistinguishable from  
186 each other, thus supporting the conclusion these stocks are most likely a single population; the *6aS*  
187 herring, which were differentiated from all populations but more closely related to the southern group  
188 consisting of *CS*, *IS* and Downs herring, which had the lowest level of genetic differentiation between  
189 them. Identification of the primary genome level differences between the herring populations around  
190 Ireland and Britain offers the potential to develop a genetic assignment method for discriminating and  
191 resolving the outstanding issues of separating mixed survey and commercial catches in ICES Divisions  
192 6.a, 7.b–c.

193 The aims of the current study were therefore to:



- 194 (i) validate a small ‘toolbox’ of genetic markers, from those identified by Han *et al.* (2020),  
195 that could be used to develop genetic baselines for the individual populations in Divisions  
196 6.a, 7.b–c.
- 197 (ii) develop a temporally stable genetic baseline dataset by collecting and analysing multiple  
198 years of spawning baseline samples from each population.
- 199 (iii) develop, test and validate an assignment model for the genetic assignment of individuals  
200 of unknown origin collected in Divisions 6.a, 7.b–c back to their population of origin.

201

## 202 **Materials and Methods**

### 203 **Sampling and DNA isolation**

204 Samples of herring were collected from the catches of fisheries surveys and commercial fishing  
205 operations, between 2014 and 2021 in the core ICES Divisions 6.a, 7.b–c area and on the adjacent  
206 populations where possible. Each fish was measured for total length (to the 0.5 cm below), total body  
207 weight to the nearest 1 g and assessed for sex and maturity. Samples processed by Marine Scotland  
208 Science (MSS) were maturity staged using the 9-point scale, those processed by the Irish Marine  
209 Institute (MI) were maturity staged using the 8-point scale and samples processed by the Wageningen  
210 University and Research (WUR) on behalf of the Dutch Pelagic Freezer Trawler Association (PFA) were  
211 maturity staged using the ICES 6-point scale (ICES, 2011). All maturity stages were converted to the  
212 ICES 6-point scale according to Mackinson *et al.* (2021). A 0.5 cm<sup>3</sup> piece of tissue was excised from  
213 the dorsal musculature of each specimen, taking care to avoid skin and scales, and stored in absolute  
214 ethanol at 4°C. Archive fin clips were also available from the spawning baseline samples collected  
215 during the WESTHER project 2003-2004 (FP5-LIFE QUALITY Q5RS-2002-01056; Hatfield *et al.*, 2005).  
216 Total genomic DNA (gDNA) was extracted from c.10 mg of tissue or fin clip from each fish using 300 µl  
217 of 10% Chelex suspension and 5 µl of Proteinase K (20 mg/µl). Extracted DNA was stored in 96 well  
218 PCR plates at -20°C until ready for genotyping.

219

## 220 **Genetic marker identification**

221 The SNPs used in the current study (ESM Table 1) were identified during the GENSINC project (GENetic  
222 adaptations underlying population Structure IN herring; Research Council of Norway project 254774)  
223 and were derived from the analyses of WGS of pooled samples from herring populations across the  
224 species distribution, which was undertaken to study the biological significance of the genetic variants  
225 underlying ecological adaptation in the Atlantic herring (Han *et al.*, 2020; Lamichhaney *et al.*, 2012;  
226 Martinez Barrio *et al.*, 2016; Pettersson *et al.*, 2019). The subset of SNPs was selected following testing  
227 of candidate SNPs with the highest delta allele frequency (dAF) values from the major genomic regions  
228 of divergence in the contrasts between populations around Ireland and Britain. The 45 SNPs selected  
229 were distributed across 8 chromosomes and comprised 14 loci (ESM Table 1). Linked SNPs were  
230 retained in the panel in order to add a level of redundancy and ensure that key genomic regions (loci)  
231 were well represented even in the instance of missing genotype data from an individual.

232

## 233 **Genotyping**

234 The majority of samples were genotyped utilising a genotyping by sequencing approach (Vartia *et al.*,  
235 2016) described in detail and validated in Farrell *et al.* (2016; 2021). In short, locus-specific forward  
236 and reverse primers were designed for SNP loci with the Primer3 application (Rozen and Skaletsky,  
237 2000) in Geneious® 7.0 (Kearse *et al.*, 2012) with optimal primer length set at 20bp and product size  
238 range at 120-180bp. Primers were designed to bind in conserved flanking regions to minimise the  
239 possibility of null alleles and were cross-referenced with existing genome sequence data to identify  
240 primers that annealed to multiple regions, which if detected were excluded. The forward and reverse  
241 locus-specific primers were adapted, to facilitate combinatorial barcoding of amplicons, by adding  
242 either an M13-R (5'-GGAAACAGCTATGACCAT-3') or CAG (5'-CAGTCGGGCGTCATCA-3') universal tail to

243 the 5' end and were divided into multiplex panels in MultiPLX 2.1 (Kaplinski *et al.*, 2005). A set of  
244 ninety-six 11bp combinatorial barcodes were used to identify individuals within pooled sequencing  
245 runs. An M13-R universal tail was added to the 3' end of forty-eight of the barcodes and a CAG  
246 universal tail to the 3' end of the remaining forty-eight barcodes, yielding 2,304 possible combinations.  
247 The tagged primers and tagged barcodes were tested for the formation of secondary structures  
248 (hairpins, primer dimers and hetero dimers) with the IDT OligoAnalyzer Tool 3.1  
249 (<http://eu.idtdna.com/calc/analyzer>).

250 Amplification and barcoding reactions were carried out using a two-step PCR as described in Farrell *et*  
251 *al.* (2016 and 2021). In short, the first PCR involved the amplification of the target SNPs and the second  
252 PCR involved the incorporation of the combinatorial barcodes for individual identification. Following  
253 PCR amplification each plate of amplicons was pooled and then standardised for concentration and  
254 combined into a single sample before sending for library preparation and amplicon sequencing by a  
255 third-party sequencing service provider. Six different herring amplicon sequencing runs were  
256 conducted over the course of the current project using both the Illumina MiSeq and HiSeq platforms.  
257 The raw data from these runs were treated following the same protocols in order to derive the final  
258 individual genotypes. Raw FASTQ sequence data were downloaded from Illumina BaseSpace and initial  
259 quality control was performed using FastQC (Babraham, 2016). Reads were sorted and grouped using  
260 a modified python script (Vartia *et al.*, 2016) based on the Levenshtein distance metric. The raw  
261 sequence data were processed by identifying sequence reads containing the forward and reverse  
262 combinatorial barcodes and the locus-specific primers. Reads were sorted hierarchically and grouped  
263 into five separate FASTA files as reads with: no barcode, one barcode, two barcodes and no primers,  
264 two barcodes and two non-matching primers, two barcodes and two matching primers. Only reads  
265 containing two barcodes and two matching primers were included in further analyses. These reads  
266 were grouped by locus and individual before removing the barcode from the sequences.

267 SNP genotyping was automated by using a modified Perl script from the Genotyping-in-Thousands by  
268 sequencing (GT-seq) approach (Campbell *et al.*, 2015), which counts amplicon-specific sequences for  
269 each allele, and uses allele ratios to determine the genotypes. The Perl scripts were modified in the  
270 current project to use the output of the custom python scripts as the input. The default settings of the  
271 GT-Seq Perl script designated allele ratios >10.0 to be called as homozygous for allele 1, ratios <0.1 to  
272 be called as homozygous for allele 2, and ratios between 0.2 and 5.0 to be called as heterozygous  
273 (Campbell *et al.*, 2015). These ratios were optimised for the data and markers in the current study by  
274 analysing each marker separately and plotting the genotyping calls from which new ratios were  
275 calculated for each marker. The average designated allele ratios in the current study were >5.0 to be  
276 called as homozygous for allele 1, ratios <0.2 to be called as homozygous for allele 2, ratios between  
277 0.3 and 3.33 to be called as heterozygous and ratios between 3.34-4.9 and 0.201-0.29 were called as  
278 NA (NA = no genotype call made). Individuals with less than 10 reads at a particular locus were also  
279 designated as NA. Only individuals with greater than 89% genotyping success (i.e. 40/45 genotypes)  
280 were retained in the dataset.

281 Genotyping of the majority of samples collected from quarter three 2019 to 2021 was undertaken by  
282 a commercial provider; IdentiGEN, Dublin, Ireland, using their proprietary *IdentiSNP* genotyping assay  
283 chemistry, which utilises target specific primers and universal hydrolysis probes. Following an end-  
284 point PCR reaction, different genotypes were detected using a fluorescence reader. Concordance  
285 between the two genotyping methods was confirmed by genotyping a subset of samples from each  
286 of the target populations (n=24 per population) and confirming that the same genotypes were called  
287 with each method (data not shown).

288

## 289 **Baseline dataset analyses**

290 It should be noted that the aim of the current study was not to undertake an exhaustive population  
291 genetics and demographic study of the herring populations around Ireland and Britain but was to

292 develop a genetic based method to separate the herring caught in putatively mixed survey and  
293 commercial catches in ICES Divisions 6.a, 7.b and 7.c into their population of origin. The analytical  
294 approaches followed were tailored to this specific task. The limited number of genetic markers used  
295 in the current study were high graded to maximise the power of discrimination between the core  
296 Division 6.a populations and in some instances comprised multiple SNPs from a small number of loci.  
297 Therefore, the dataset may not be suitable for conventional population genetic analyses and as such  
298 some of the analyses presented (e.g. estimation of fixation indices) were for exploratory purposes  
299 only.

300 Deviations from Hardy–Weinberg equilibrium (HWE), linkage disequilibrium (LD), and excess and  
301 deficiency of heterozygotes in the *full baseline dataset* (see Results) were tested with Genepop 4.2  
302 using default settings (Rousset, 2008). Microsatellite Analyzer (MSA) 4.05 (Dieringer and Schlötterer,  
303 2003) was used, under default settings, to assess multi-locus pairwise  $F_{ST}$  with 1,000 bootstrap  
304 replications and 10,000 permutations. In all cases with multiple tests, significance levels were adjusted  
305 using the sequential Bonferroni technique (Rice, 1989). In order to visualise the pairwise  $F_{ST}$  results  
306 and to explore the relationships between the different samples, Principal Coordinate Analysis (PCoA)  
307 using the covariance standardised method was conducted in GenALEx 6.51b2 (Peakall and Smouse,  
308 2012).

309 Discriminant analysis of Principal Components (DAPC), from the *R* package *adegenet* (Jombart, 2008;  
310 Jombart *et al.*, 2010), is a multivariate approach that transforms multi-locus genotype data using PCA  
311 to derive a set of uncorrelated variables, which serve as input for discriminant analysis (DA). The DA  
312 aims to maximize among-group variation and minimize within-group variation. DAPC does not make  
313 assumptions of underlying population genetic processes (e.g. neutrality, linkage equilibrium, Hardy–  
314 Weinberg equilibrium), therefore it was appropriate to use this approach with the data in the current  
315 study. In the first instance DAPC was run using the 64 baseline samples as the input groups and  
316 retaining all PCs and discriminant functions. The DAPC was run again after the temporal samples were

317 combined to form seven groups (*6aS*, *CS*, *IS*, *6aN\_Aut*, *6aN\_Sp*, *NS*, *DWN*) which represented the  
318 putative populations in the study area. Following further analyses (see Results) a reduced *6a baseline*  
319 *dataset* consisting only of samples from groups that are confirmed as being present in Division 6.a i.e.  
320 *6aS*, *6aN\_Aut* and *6aN\_Sp*, was analysed using DAPC. In this instance DAPC was conducted as before  
321 with prior definition of group membership and also following a second approach using the *find.clusters*  
322 function to infer genetic clusters. This function transforms the data using principal component analysis  
323 (PCA), then runs the *K*-means algorithm (function *kmeans* from the *stats* package) with increasing  
324 values of *K* and computes Bayesian Information Criterion (BIC) to assess the best supported model.

325

### 326 **Assignment model development**

327 The *R* package *assignPOP* (Chen *et al.*, 2018), which performs population assignment using a machine-  
328 learning framework, was used to develop the assignment model. *assignPOP* uses Monte-Carlo cross-  
329 validation (*assign.MC*) to divide the baseline data into a training dataset and test dataset. The  
330 assignment model is developed with the training dataset and subsequently tested with the  
331 independent test dataset, which avoids introducing ‘high-grading bias’ (see Anderson, 2010). As the  
332 Monte-Carlo procedure samples random individuals each time, it does not guarantee that every  
333 individual is sampled. Therefore, *assignPOP* can perform an additional method of *K*-fold cross-  
334 validation (*assign.kfold*), which involves randomly dividing the individuals from each population into  
335 *K* groups and then using one group from each population as test individuals and the remaining *K-1*  
336 groups as the training individuals. Assignment tests are performed until every group and hence  
337 individual is tested, resulting in *K* tests. *assignPOP* has a number of classification model options  
338 including the *SVM* model from the *R* package *e1071* (Meyer *et al.*, 2015). Based on the results of the  
339 aforementioned baseline dataset analyses it was decided to develop the assignment model in  
340 *assignPOP* trained on the reduced *6a baseline dataset* as the constituent populations had the highest  
341 level of discrimination between them with the current marker panel. As per the DAPC analyses, the

342 assignment model was developed using two different approaches with, in this case, each approach  
343 conducted at two hierarchical levels.

344 *Approach 1* used the *6a baseline dataset* with the predefined *6aS*, *6aN\_Aut* and *6aN\_Sp* population  
345 groups. The assignment was conducted at two hierarchical levels based on the power to discriminate  
346 the different groups in the DAPC analyses. In *Level 1* *6aS* and *6aN\_Sp* were combined and tested  
347 against *6aN\_Aut*. In *Level 2* the combined *6aS/6aN\_Sp* group was split, and the individual groups  
348 tested against each other. *Approach 2* was also performed in a hierarchical manner as per *Approach*  
349 *1*. However, *Approach 2* was initially independent of the assumptions of prior populations and instead  
350 used the output of the *K*-means clustering analyses of the *6a baseline dataset* to identify different  
351 baseline assignment clusters. In the cases where multiple clusters represented a single assumed  
352 population of origin these clusters were combined.

353 In order to avoid over-fitting, the model and to objectively determine the optimum number of PCs to  
354 be used in both assignment approaches, DAPC cross-validation was conducted with the *xvalDapc*  
355 function in *adegenet*. Exploratory analyses were conducted in *assignPOP* to determine the optimum  
356 model and kernel for the assignment model and the *tune*, *tune.control* and *best.svm* functions in *R*  
357 package *e1071* (Meyer *et al.*, 2015) were used to perform a grid search for the optimum values for  
358 cost and gamma. These parameters were used for testing the rate of self-assignment using both  
359 Monte-Carlo and *K*-fold cross-validation to estimate membership probability. In order to avoid  
360 unbalanced sample sizes among the baseline groups the number of individuals in the training sets  
361 were specified and were limited by the number of individuals in the smallest group. *Level 1*  
362 assignments were tested with 200, 400, 600 and 800 individuals in the training set, whilst the  
363 *Approach 1-Level 2* assignment was tested with 50 and 75 individuals and *Approach 2-Level 2*  
364 assignment with 100, 150 and 200 individuals. Both Monte-Carlo and *K*-fold cross-validation were  
365 performed using 25%, 50%, 75% and 100% of the highest  $F_{ST}$  loci (*loci.sample="fst"*) and all tests were  
366 conducted with 100 iterations.

367 An important consideration when developing the assignment model was to determine how many  
368 genetic markers were required for accurate assignment using either of the approaches and at either  
369 of the levels. This enabled the threshold for missing data of unknown samples to be set with a robust  
370 basis without compromising the integrity of the assignments. In order to do this the Monte-Carlo cross  
371 validation analyses were run again with random sampling of loci (*loci.sample="random"*) rather than  
372 highest  $F_{ST}$  loci and were run with 20-100% of loci in 10% intervals. All other parameters were the  
373 same as the previous runs.

374

### 375 **Assignment model validation with archive samples**

376 As an additional validation of the baseline assignment models the WESTHER baseline samples  
377 collected in 2003/2004 in Division 6.a were used as known-unknown samples and assigned to the  
378 contemporary baseline in order to test the long-term temporal stability of the assignment models.  
379 The WESTHER samples were processed and genotyped following the same method as the other  
380 samples in the study. The assignments were conducted using the *assign.X* function in *assignPOP* (Chen  
381 *et al.*, 2018) using the two hierarchical approaches and with the same model parameters as described  
382 above. For each approach, the *Level 1* assignment was conducted with all the individuals in the sample  
383 and the *Level 2* assignment, on a subset of individuals that required further assignment. A successful  
384 assignment probability threshold was set at 0.67, which indicated a situation where one assignment  
385 outcome was twice as likely as the alternate outcome. This was deemed an acceptable level of  
386 confidence given the high level of self-assignment accuracy of the baseline datasets. The final  
387 assignment call of each individual was based on a combination of the *Level 1* and *Level 2* assignments.  
388 Final sample assignments were plotted using the *draw.pie* function of the R package *mapplots*. In  
389 order to test the potential effect of increasing the assignment threshold and also to compare the  
390 relative assignment rates between the assignment approaches, the proportion of individuals falling  
391 below thresholds of 0.67, 0.7, 0.8 and 0.9 were also calculated.



392

### 393 **Exploratory analyses with contemporary non-baseline samples**

394 Additional samples, which were not considered to be baseline samples (i.e. they were not collected  
395 on known spawning grounds or were not in the correct maturity stage) were also collected during the  
396 study. These non-baseline samples were used to further test the assignment model and also to provide  
397 an exploratory analysis of potential mixing of populations within Divisions 6.a, 7.b-c. The samples were  
398 assigned as per the WESTHER samples and divided by quarter for plotting using *mapplots*. As with the  
399 archive samples the effect of the range of assignment thresholds was also tested with these samples.

400

## 401 **Results**

### 402 **Sampling and genotyping success rate**

403 Due to the opportunistic nature of the sampling, the samples contained a significant mix of length  
404 classes and maturity stages (ESM Tables 2 and 3). In total 92 contemporary samples were collected  
405 (Figure 1 and ESM Table 2), comprising 6,591 individual herring of which 5,638 individuals (86%)  
406 passed the genotyping threshold of 89% (40/45 SNPs genotyped). All 45 SNPs were successfully  
407 genotyped in more than 92% of retained individuals. For the purposes of developing robust baselines  
408 for genetic assignment, it is critical to avoid including individuals with uncertain origin. Therefore, only  
409 samples with a significant number of maturity stage three (spawning) individuals (ICES, 2011), caught  
410 in close proximity to known spawning grounds at recognised spawning times were selected to be  
411 baseline samples. In order to further limit the potential for misclassification as a baseline spawning  
412 sample, only individuals classified as maturity stage three were included in the baseline dataset. The  
413 resulting contemporary *baseline dataset* contained 64 samples, comprising a total of 3,480 herring  
414 (Figure 1).

415 The 28 remaining samples (1,514 individuals) were retained in a separate *non-baseline dataset*, to be  
416 used to test the assignment model and provide an exploratory analysis of potential mixing of  
417 populations within Divisions 6.a., 7.b-c. In addition, five archive baseline samples comprising 340  
418 individuals collected in 2003 and 2004, were also available from the WESTHER project, of which 270  
419 surpassed the genotyping quality control threshold. These samples were retained in an *archive*  
420 *dataset* for the purposes of having independent baseline samples for the validation of the assignment  
421 model and for testing the long-term temporal stability of the assignment model.

422

### 423 **Baseline dataset analyses**

424 There were no significant patterns of deviation from HWE, heterozygote deficiency or heterozygote  
425 excess at the locus level (45 SNPs). At the population level significant deviations from HWE were  
426 observed in samples *6aN\_Sp\_18b* (10/45 SNPs), *6aS\_17d* (11/45), *6aS\_17e* (12/45), *6aS\_19c* (6/45).  
427 Samples *6aS\_17d* and *6aS\_17e* also displayed indications of a significant heterozygote deficiency in  
428 eight and thirteen loci, respectively, which was likely the result of some of the *6aS* samples containing  
429 a mixture of early and later spawning components (see pairwise  $F_{ST}$  results). Samples *6aN\_Sp\_18b*,  
430 *6aS\_19c* and *DWN\_18* displayed indications of significant heterozygote excess at ten, seven and seven  
431 loci, respectively. The significant indications of LD were in keeping with the loci already identified (ESM  
432 Table 1) from Han *et al.* (2020). All markers and all samples were retained in the *baseline dataset* for  
433 further analyses.

434 The analyses of multi-locus pairwise  $F_{ST}$  (ESM Table 4) indicated proportionately higher  $F_{ST}$ 's and  
435 significant differentiation between samples collected from the different putative populations except  
436 between the *6aN\_Aut* and *NS* populations, which displayed little if any significant genetic  
437 differentiation among or between the temporal samples. There was no significant differentiation  
438 between the temporal samples from the *IS* or *DWN* population and there was little if any significant  
439 genetic differentiation between the temporal samples from the *CS* and *6aN\_Sp*. There were some

440 indications of differentiation between the temporal samples from *6aS*, with some of the samples  
441 collected in January and February (*6aS\_17a*, *6aS\_17b*, *6aS\_18a*) showing a low level of differentiation  
442 from the other samples. The PCoA of the pairwise  $F_{ST}$  results enabled a clearer interpretation and  
443 illustrated the clustering of samples within and between putative populations (Figure 2). The temporal  
444 samples from each population clustered together though some intrapopulation diversity was evident  
445 particularly among the *6aS* and *6aN\_Aut* samples. The *6aN\_Sp* samples were distinct from the  
446 *6aN\_Aut* samples and were closely aligned with the late *6aS* samples i.e. those collected in quarter 1.  
447 The DAPC results supported the previous indications of temporal stability within each of the putative  
448 population areas with samples from the same putative populations clustering together (ESM Figure  
449 1). Therefore, the temporal samples were combined to form seven groups (*6aS*, *CS*, *IS*, *6aN\_Aut*,  
450 *6aN\_Sp*, *NS*, *DWN*), which represented the putative populations in the study area. The DAPC and MSA  
451 analyses were run again on the pooled samples. Pairwise multi-locus  $F_{ST}$  analyses of the pooled  
452 *baseline dataset* indicated significant differentiation between all baseline population groups (Table 1).  
453 The lowest level of differentiation was between the *6aN\_Aut* and *NS* groups. The level of  
454 differentiation between these groups ( $F_{ST} = 0.016$ ) was lower than the average differentiation (0.032)  
455 between all of the samples within the *6aN\_Aut* pool (ESM Table 4). The highest level of differentiation  
456 was between the *6aN\_Sp* group and the other groups. There was also a very low level of differentiation  
457 between the *DWN* group and the *CS* and *IS* groups, whilst the *DWN* group had a high level of  
458 differentiation from the *NS* group.

459 The DAPC results indicated the same pattern of structure as the  $F_{ST}$  analyses (Figure 3) and also as  
460 those observed in Han *et al.* (2020) based on whole genome analyses. The highest level of  
461 discrimination observed in the DAPC analyses was along the primary axis (74%) and concerned the  
462 *6aS* and the *6aN\_Aut* groups, though some outliers were evident. The *6aS* and *6aN\_Sp* groups were  
463 discriminated primarily on the secondary axis (18%). These groups partially overlapped, indicating a  
464 lower potential to accurately discriminate between them. The *6aS*, *CS* and *IS* groups overlapped,

465 indicating that the current marker panel cannot be used to distinguish these groups with a high level  
466 of accuracy. Therefore, the *CS* and *IS* groups were removed from the baseline data and excluded from  
467 further analyses. There is no evidence of significant numbers of herring from these groups being  
468 present in Division 6.a (Farrell *et al.*, 2021). DAPC also indicated an overlap and an inability to  
469 distinguish between the *6aN\_Aut* and *NS* groups. There is currently no evidence to support the  
470 assertion that the North Sea autumn spawning herring comprise a different population to the *6aN\_Aut*  
471 herring (Farrell *et al.*, 2021), however this distinction was not the focus of the current study, as such  
472 the *NS* samples were removed from further analyses. The *DWN* group was confirmed to be distinct  
473 from the *NS* group though it could not be reliably discriminated from the *CS* and *IS* groups with the  
474 current panel of markers and as such the *DWN* group was removed from further analyses. The  
475 resulting reduced *6a baseline dataset* consisted only of the 43 samples from populations that are  
476 confirmed as being present in Division 6.a i.e. *6aS*, *6aN\_Aut* and *6aN\_Sp*.

477 Clustering analyses of the *6a baseline dataset* indicated that six clusters were the optimum number  
478 to provide the most accurate division of the samples based on their assumed population of origin (ESM  
479 Table 5). DAPC of the *clustered 6a baseline dataset* indicated clear division between the clusters with  
480 minimal overlap (Figure 3), suggesting that an SVM model-based assignment using this approach  
481 would have a high accuracy. The majority of the *6aN\_Aut* individuals were represented by the  
482 combined *Clusters\_1+3+5*, and the majority of the *6aS* individuals by the combined *Clusters\_4+6*  
483 (Table 2). The majority of *6aN\_Sp* individuals were in *Cluster\_2*, however this cluster also contained a  
484 significant proportion of *6aS* individuals. These individuals were primarily from the samples of late  
485 spawning herring collected in Division 6.a.S in January and February. In terms of cluster composition,  
486 *Clusters\_1+3+5* comprised 98% *6aN\_Aut* samples and as such were considered, for the purposes of  
487 the assignment model, a proxy for that population group. *Clusters\_4+6* comprised 89% *6aS* and 10%  
488 *6aN\_Aut*. There is some evidence that the *6aN\_Aut* individuals in these clusters may be misidentified  
489 *6aS* herring or strayers from *6aS* (see Farrell *et al.*, 2021), therefore, *Clusters\_4+6* were considered to  
490 represent *6aS* for the purposes of assignment. *Cluster\_2* comprised 54% *6aS* and 44% *6aN\_Sp* and was

491 considered, for the purposes of the assignment, to represent a mix of *6aS* and *6aN\_Sp* herring. The  
492 resulting *clustered dataset* comprised *Clusters\_1+3+5*, *Clusters\_4+6*, *Cluster\_2*. In order to simplify the  
493 nomenclature and align it with the *Approach 1* assignment, from this point on these clusters will be  
494 referred to as *6aN\_Aut<sup>A2</sup>*, *6aS<sup>A2L2</sup>* and *6aS/6aN\_Sp<sup>A2L2</sup>*, respectively.

#### 495 **Assignment model development**

496 The optimum numbers of PCs for the *Approach 1-Level 1* dataset and *Approach 1-Level 2* dataset,  
497 determined as the values with the lowest root mean squared error (RMSE) following DAPC cross-  
498 validation, were 40 and 35, respectively. The optimum number of PCs for the *Approach 2-Level 1*  
499 dataset and *Approach 2-Level 2* dataset were 30 and 5, respectively. There was however little  
500 difference between the number of PCs retained in all cases suggesting that the assignment is not  
501 sensitive to this parameter. The optimum model and kernel for the assignment model were the SVM  
502 model and the radial basis function (RBF) kernel. Grid search indicated the optimum values for cost  
503 and gamma in *Approach 1-Level 1* and *Approach 2-Level 1* were 1 and 0.33, respectively and in  
504 *Approach 1-Level 2* and *Approach 2-Level 2* were 1 and 0.5, respectively.

505 There was little difference between the self-assignment accuracy of *Approach 1-Level 1* and *Approach*  
506 *2-Level 1* (ESM Figures 2 & 3 and Table 3). Both approaches resulted in self-assignment rates greater  
507 than 90% and neither approach was observed to be particularly sensitive to the number of individuals  
508 in the training data. Similarly, neither approach was observed to be particularly sensitive to the  
509 proportion of highest  $F_{ST}$  loci used in the analyses. The main difference between the two approaches  
510 at *Level 1* was the higher probabilities of assignment and lower error observed in the *K*-fold analyses  
511 in *Approach 2* (ESM Figure 3 and Table 3). Conversely there were large differences between the two  
512 approaches in the *Level 2* assignments, where *Approach 1-Level 2* did not confidently assign *6aN\_Sp*  
513 samples to their baseline, whereas *Approach 2-Level 2* achieved near perfect self-assignment to both  
514 the *6aS<sup>A2L2</sup>* and *6aS/6aN\_Sp<sup>A2L2</sup>*.

515 *The Approach 1-Level 1* assignment was more sensitive to the number of loci *than Approach 1-Level 2*  
516 (ESM Figure 4 and ESM Table 6). This was particularly notable for the *6aS/6aN\_Sp* group in *Level 1*,  
517 where there was a significant drop in assignment accuracy and an increase in the number of outliers  
518 below 50% of loci. This indicated that at least twenty-three of the forty-five loci were required for  
519 accurate assignment at this level. Ideally over 60% (27 loci) should be genotyped at this level to ensure  
520 assignment accuracy. The *Approach 1-Level 2* assignment was not very sensitive to the number of loci  
521 and there was little difference in the accuracy of assignment down to 20% of the loci. *The Approach*  
522 *2-Level 1* assignments had a similar pattern of sensitivity to the number of loci as the *Approach 1*  
523 assignments indicating that a minimum of 60% of loci should be genotyped at this level to ensure  
524 assignment accuracy. The *Approach 2-Level 2* assignments had a higher level of accuracy than the  
525 *Approach 1-Level 2* assignments and again were less sensitive to the number of markers than the *Level*  
526 *1* assignments.

527

#### 528 **Assignment model validation with archive samples**

529 The final assignment call of each individual in the archive WESTHER samples was based on a  
530 combination of the *Level 1* and *Level 2* assignments according to the assignment decision table (Table  
531 4). The assignments of the WESTHER *6aN\_Aut* samples from 2003 (*6aN\_03*) and 2004 (*6aN\_04*)  
532 displayed near perfect assignment to the *6aN\_Aut* groups, with only one individual in each of the years  
533 being misassigned to the *6aS* groups (Figure 4 and ESM Table 7). The assignment of the 2003 *6aS*  
534 WESTHER sample (*6aS\_03*) was more uncertain, with a quarter of individuals misassigned to the  
535 *6aN\_Aut* groups (ESM Table 7). The 2004 *6aS* sample (*6aS\_04*) had a higher level of correct assignment  
536 (>80%). The assignment of the 2004 *6aN\_Sp* (*6aN\_Sp\_04*) sample indicated perfect assignment, at  
537 *Level 1* in both approaches, to the *6aS/6aN\_Sp* groups. As expected, the *Approach 1-Level 2*  
538 assignment displayed a high rate of misassignment (53%) to the *6aS* group and a high rate of below  
539 threshold individuals (37%), which could not be confidently split below the level of *6aS/6aN\_Sp*. The

540 *Approach 2-Level 2* assignment provided a more robust assignment with 67% of individuals assigned  
541 to *6aS/6aN\_Sp*<sup>A2L2</sup>. It should be noted that the *6aN\_Sp\_04* WESTHER sample did not fulfil the criteria  
542 of baseline samples as defined in the current study as 27% of the individuals were maturity stage 2  
543 individuals (ESM Table 2).

544 The average proportion of unassigned individuals in the WESTHER samples increased with increasing  
545 assignment threshold for *Approach 1-Level 1* and 2 but only for *Level 1* in *Approach 2* (Table 5). Analysis  
546 of the individual rather than average values (ESM Table 8) showed differences between the individual  
547 samples. All of the *6aN\_Aut* samples' individual assignments had a probability greater than 0.9,  
548 indicating they were at least nine times more likely that the alternate assignment (ESM Table 8). The  
549 assignment probabilities for the 2003 *6aS* individuals were more variable at *Level 1* for *Approach 1*  
550 and 2, highlighting a degree of uncertainty around the assignment of some of the individuals, however  
551 the *Level 2* assignments all had a probability greater than 0.9 (ESM Table 8). The 2004 *6aS* individuals  
552 also showed some uncertainty at *Level 1* and at *Approach 1-Level 2*. The *Approach 2-Level 2*  
553 assignments all had a probability greater than 0.9. The individuals of the *6aN\_Sp\_04* sample had the  
554 highest proportion of unassigned individuals at the higher thresholds for *Approach 1-Level 2*. The  
555 *Approach 2-Level 2* assignments all had a probability greater than 0.9.

556

### 557 **Exploratory analyses with contemporary non-baseline samples**

558 The quarter 1 non-baseline samples from Division 6.a.N came primarily from the Scottish West Coast  
559 International Bottom Trawl Survey (SWC-IBTS) and comprised a number of small samples of herring  
560 of mixed maturity stages (Figure 5 and ESM Tables 2 & 3). The most northerly samples (*6aN\_Sp\_19a*  
561 and *6aN\_Sp\_19b*) were dominated by resting (*Stage 5*) individuals and the assignments indicated a  
562 significant proportion of *6aN\_Aut* individuals, though assignments to both the *6aS* and *6aS/6aN\_Sp*  
563 groups were also evident (ESM Table 7). One haul to the north of the Hebrides (*6aN\_Sp\_19d*)  
564 comprised primarily maturing (*Stage 2*) and spawning (*Stage 3*) herring that assigned to the *6aS* and

565 *6aS/6aN\_Sp* groups. In the south Minch area there was a significant proportion of immature juvenile  
566 (*Stage 1*) individuals in one sample (*6aN\_Sp\_19h*), which assigned primarily to *6aS*. The other two  
567 hauls in this area (*6aN\_Sp\_19f* and *6aN\_Sp\_19g*) also had the majority of assignments to the  
568 *6aS/6aN\_Sp* groups.

569 The quarter 1 and 2 samples from Irish coastal waters were collected from bycatch of commercial  
570 vessels and comprised four samples, one sample from Lough Foyle (*6aS\_19b*), one from Lough Swilly  
571 (*6aS\_19a*) and two from Galway Bay (*6aS\_18b* and *6aS\_18c*) (Figure 5 and ESM Table 2). The Lough  
572 Foyle sample contained mainly *Stage 2* individuals with a small proportion of *Stage 3* individuals and  
573 the Lough Swilly sample, which was caught two days earlier, contained predominately *Stage 2*  
574 individuals and some spent (*Stage 4*) fish. The assignment of both samples was quite similar with the  
575 majority of individuals assigned to *6aS* and most of the remaining samples to *6aS/6aN\_Sp*. The Galway  
576 Bay samples were caught later in quarter 1 and 2 and had similar maturity staging with primarily *Stage*  
577 *4* and *Stage 5* individuals. The assignments of the two samples were also quite consistent with each  
578 other with the majority of individuals assigned to *6aS*.

579 The quarter 3 non-baseline samples all came from Division 6.a.N and comprised samples from acoustic  
580 survey and monitoring fishery catches (see Mackinson *et al*, 2019a; 2019b; 2021). The maturity stages  
581 and length frequencies of the samples were notably different to the quarter 1 samples as there was a  
582 significant proportion of *Stage 1* and 2 fish (Figure 5 and ESM Tables 2 & 3). The three samples from  
583 the Minch (*6aN\_18a*, *6aN\_19h* and *6aN\_19i*) primarily comprised *Stage 1* individuals, which assigned  
584 mainly to *6aS* and *6aS/6aN\_Sp*. The two samples from northwest of Cape Wrath (*6aN\_18b* and  
585 *6aN\_19e*) were composed of mainly *Stage 2* individuals and comprised a mix of *6aN\_Aut*, *6aS* and  
586 *6aS/6aN\_Sp*. The two samples from July (*6aN\_19f* and *6aN\_19g*), caught west of the Hebrides and  
587 north of Scotland, had similar maturities with mainly *Stage 2* individuals and a smaller proportion of  
588 *Stage 5* fish. The majority of individuals in the west of Hebrides sample were assigned to *6aS*.  
589 Conversely the north of Scotland sample, which was caught adjacent to the 4°W line of longitude,



590 contained a significant proportion of *6aN\_Aut* fish in addition to significant proportions of *6aS* and  
591 *6aS/6aN\_Sp* individuals.

592 The quarter 4 non-baseline samples all came from Divisions 6.a.S, 7.b and Lough Foyle and comprised  
593 samples from monitoring fishery catches and bycatch. The nine samples, caught over 5 years,  
594 contained a wide range of maturity stages, from *Stage 1* to *Stage 4* yet the assignments were relatively  
595 consistent across all of the samples (Figure 5 and ESM Tables 2 & 7). The five Division 6.a.S samples  
596 contained mainly a mixture of *Stage 2* and *Stage 4* individuals with a small number of *Stage 3* fish and  
597 the majority of individuals were assigned to *6aS* in all samples (ESM Table 7). The Division 7.b sample  
598 (*6aS\_19d*) contained *Stage 1* and *Stage 2* fish and the assignments followed the same pattern as the  
599 Division 6.a.S samples. The three Lough Foyle samples were collected in three different years and had  
600 markedly different maturity stages, with one sample (*6aS\_17f*) dominated by *Stage 3* fish, one sample  
601 (*6aS\_18e*) predominately *Stage 2* and the third sample (*6aS\_20b*) a mixture of *Stages 1-4* fish (Figure  
602 5 and ESM Table 2). Regardless, the assignment outputs were broadly similar between the three  
603 samples and with the Division 6.a.S, 7.b samples, apart from a higher proportion of *6aS/6aN\_Sp* fish  
604 in two of the samples (ESM Table 7).

605 Similar to the WESTHER samples, the average proportion of unassigned individuals increased  
606 significantly with increasing assignment threshold for *Approach 1-Level 1* and in particular for  
607 *Approach 1-Level 2* (Table 5). This was not as significant in *Approach 2*, where there was a minor  
608 increase in the proportion of unassigned individuals at increasing *Level 1* thresholds and almost no  
609 increase in the *Level 2* assignments. Analysis of the individual rather than average values (ESM Table  
610 8) showed differences between the individual samples. The non-baseline quarter 1 samples from  
611 Division 6.a.N displayed the highest level of unassigned individuals, particularly at the *Approach 1-*  
612 *Level 2* assignment. The *Approach 2* assignment of the majority of samples resulted in a lower  
613 incidence of unassigned individuals at all threshold levels.

614

615 **Discussion**

616 The genetic markers and assignment methods presented in the current study constitute a ‘tool box’  
617 that can be used for the assignment of herring caught in mixed survey and commercial catches in  
618 Division 6.a into their population of origin with a high level of accuracy (>90%). This will enable the  
619 population assignment of commercial catch and acoustic survey (e.g. MSHAS) samples, which will  
620 facilitate the development of separate stock assessments for the populations in this area.

621 Both assignment approaches had a high level of self-assignment accuracy though it was notable that  
622 there was a higher power to discriminate between the groups in *Level 1* than the groups in *Level 2*. In  
623 *Approach 1-Level 2* there was a weakness in the model in discriminating between the *6aN\_Sp* samples  
624 and the quarter 1 late-spawning *6aS* samples. This was due in part to the small number of samples of  
625 *6aN\_Sp* in particular, and potentially also to the genetic markers used not being optimised for  
626 distinguishing between these groups. There are inherent difficulties in sampling these groups for  
627 which no specific fishery currently exists and which spawn in areas that are subject to unfavourable  
628 weather conditions for sampling at the time of spawning. Further sampling of both groups is required  
629 though, and efforts are also underway to conduct WGS on representative samples from these groups  
630 to identify more informative markers. In any case *Approach 2* mitigated this issue by combining them  
631 into a single group (*6aS/6aN\_Sp<sup>A2L2</sup> (Cluster\_2)*) for assignment purposes, which resulted in higher  
632 classification success and lower rate of unassigned individuals. In this case the majority of *6aS* fish  
633 could be separated from the other two populations with a high level of accuracy and only the minority  
634 of *6aS* fish were left in an unsorted mix with *6aN\_Sp*. This is considered preferable to the outcome of  
635 *Approach 1*, as for the purposes of splitting catch and survey samples it is better to be able to assign  
636 some level of grouping rather than have a high abundance of unassigned individuals. Mixed categories  
637 such as *6aS/6aN\_Sp<sup>A2L2</sup>* can be acknowledged in the overall abundance estimates but retained in a  
638 separate category that is not allocated to a single stock, which can also act as a precautionary buffer  
639 for any undetected misassignments. In each assignment approach at least 60% of the 45 markers were

640 required to ensure accurate self-assignment, which indicates that there is a level of redundancy built  
641 into the panel of markers as was expected given that the markers are distributed among fourteen loci.  
642 This redundancy is an advantage when analysing unknown samples as it allows up to 40% missing data  
643 in the genotypes of individuals. Missing genotypes may occur when analysing suboptimal quality  
644 samples collected from commercial catches or when analysing older archive samples, which have not  
645 been stored under optimum conditions.

646 The genetic assignment of the archive WESTHER samples confirmed longer term temporal stability of  
647 the SNP panel in the Division 6.a populations over a period of at least eighteen spawning seasons,  
648 which is a temporally relevant time scale for the purposes of stock assessment. Whilst the 2003 and  
649 2004 *6aN\_Aut* WESTHER samples assigned near perfectly to the *6aN\_Aut* groups, the assignments of  
650 the 2003 and 2004 *6aS* WESTHER samples were not as confident. There were a significant number of  
651 mis-assignments to *6aN\_Aut* groups, particularly in the 2003 *6aS* sample. This spawning sample was  
652 collected in October which is earlier than any of the contemporary samples in the *6a baseline dataset*  
653 and it is possible that these misassigned individuals shared some genetic similarities related to  
654 spawning time with the *6aN\_Aut* autumn spawning herring. Historically autumn spawning herring  
655 were abundant in Division 6.a.S and particularly in Division 7.b where they supported local fisheries  
656 (see Farrell *et al.*, 2021; ICES, 2015) however no autumn spawning was observed or sampled in this  
657 area in the course of the current study (i.e. since 2014). In fact, no spawning baseline samples were  
658 collected in Division 7.b throughout the study despite repeated sampling attempts, suggesting that  
659 either spawning in that area is at a very low level or has not occurred in recent years. However, the  
660 non-spawning herring caught in Division 7.b, genetically assigned with a high probability to *6aS*.  
661 Continued efforts should be made to ensure any spawning activity in Division 7.b is sampled if it occurs  
662 and the data added to the baselines.

663 The assignment of the non-baseline samples also provided an additional layer of validation of the  
664 assignment model and an interesting exploratory analysis of potential mixing of the different

665 populations in Division 6.a. The Division 6.a.S and 7.b sample assignments were relatively consistent  
666 across all quarters indicating stability in the composition of herring shoals in the area. In all samples a  
667 minority proportion of individuals were assigned to *6aN\_Aut* though this was mostly in keeping with  
668 the expected error rate of the assignment model, which was higher for *6aS* and *6aS/6aN\_Sp* than for  
669 *6aN\_Aut*. The samples from Lough Foyle were shown to be genetically and biologically the same as  
670 the *6aS* samples underlining the inappropriateness of the existing classification of Lough Foyle as part  
671 of the *6aN\_Aut* stock.

672 Whilst there was consistency in the assignment of the samples collected in Division 6.a.S and 7.b, the  
673 assignment of those from Division 6.a.N (excluding Lough Foyle) indicated a significant degree of  
674 mixing of different populations. *6aS* and mixed *6aS/6aN\_Sp* herring comprised a varying but significant  
675 proportion of all samples and were far in excess of the expected error rate. The assignment of the  
676 juvenile samples from the Minch primarily to *6aS*, *6aN\_Sp*, *6aS/6aN\_Sp* instead of *6aN\_Aut* was not  
677 unexpected given the existing knowledge about the larval drift in the area and the lack of  
678 differentiation between the *6aN\_Aut* and North Sea autumn spawning herring. It is well documented  
679 that the larvae of autumn spawning herring off the northwest of Scotland are carried in easterly  
680 flowing currents and spend their juvenile phase in the North Sea (Heath, 1989; Heath, 1990; Heath *et*  
681 *al.*, 1987; MacKenzie, 1985; Saville and Morrison, 1973). The mixed nature of the samples collected  
682 off Cape Wrath during the spawning season for *6aN\_Aut* herring indicated a need for ongoing  
683 monitoring of survey and commercial catches in this area as any future fisheries in this area will likely  
684 be mixed stock fisheries. The presence of *6aN\_Sp* herring in the samples was also of interest as this  
685 population used to be the dominant population in the region but was reported to have collapsed in  
686 the 1950s (Baxter, 1958). Despite this, spring spawning herring were still known to comprise up to  
687 38% of the catches off the north of Scotland, west of the 4°W line of longitude and in the North Minch  
688 in the 1960's (Saville, 1970). However, as the autumn spawning component was more abundant, the  
689 newly developing stock assessments at the time were restricted to that group and the spring spawning  
690 herring were not distinguished, which over time led to them being merged with the autumn spawners

691 for assessment purposes. The results of the current study suggest the spring spawners are still present  
692 in the area. It is not currently possible to separate them from the late spawning *6aS* herring so no  
693 conclusions can be drawn about their relative abundance, but further efforts should be directed  
694 towards improving the sampling of this population. The two samples collected in July west of the  
695 Hebrides and North of Scotland also offer some insight into the future assignments of the MSHAS  
696 samples that are collected during this period. The west of Hebrides sample comprised primarily *6aS*  
697 individuals with a smaller proportion of *6aS/6aN\_Sp* fish (Figure 5), whilst the north of Scotland  
698 sample, which was caught adjacent to the 4°W line of longitude, contained a significant proportion of  
699 *6aN\_Aut* fish in addition to significant proportions of *6aS*, *6aN\_Sp* and *6aS/6aN\_Sp* individuals.  
700 Therefore, the current approach of splitting the MSHAS data using the 56°N line of latitude and the  
701 7°W line of longitude to delineate the Division 6.a stocks is inappropriate and should be replaced with  
702 the genetic assignment approach.

703 One weakness of the assignment model in the current study is that it is solely based on the populations  
704 empirically proven to occur within Division 6.a (i.e. *6aS*, *6aN\_Aut* and *6aN\_Sp*) and does not include  
705 adjacent populations. The initial genetic analyses of the *full baseline dataset* in the current study and  
706 those in Han *et al.* (2020) demonstrate that the Irish Sea herring and the Celtic Sea herring are distinct  
707 from each other and from the other populations in Division 6.a. However, they are genetically closely  
708 related to the herring in Division 6.a.S and as such it is difficult to distinguish them with a high degree  
709 of certainty using the current marker panel. Inclusion of these populations in the baseline dataset  
710 would increase the overall uncertainty of the assignments. Despite the assertions of the WESTHER  
711 project (Hatfield *et al.*, 2005) there is no definitive evidence that a significant abundance of herring  
712 from either of these populations migrate to Division 6.a (see Farrell *et al.*, 2021). Therefore, their  
713 inclusion in the baseline datasets is not warranted at this time. The WESTHER project provided an  
714 illustration of the dangers of including multiple populations in a baseline when the power of  
715 discrimination between the populations is low. The inevitable outcome is that mixed samples will be  
716 weakly assigned and will have a high rate of misassignment. This can lead to the incorrect conclusion

717 that mixed samples come from a larger number of source populations when the converse may be true.  
718 In the current study there is the potential to misassign individuals from the Celtic Sea and Irish Sea  
719 populations, if they were present in Division 6.a, however the assignment in its current form is still a  
720 significant improvement on the existing method of splitting the stocks based on geographic  
721 delineation, which is proven to be inappropriate. Efforts should be made to identify further population  
722 specific genetic markers that may increase the discriminatory power between closely related  
723 populations. For this reason, the current marker panel should be considered the best available at the  
724 current time, but continued efforts should be made to develop it further.

725 The current study has also highlighted some of the potential stock identification issues that are  
726 apparent with the North Sea herring. The lack of differentiation between the *6aN\_Aut* herring and the  
727 North Sea autumn spawning herring suggests that the 4°W line of longitude is also inappropriate as a  
728 stock delineator. Though this has been recognised since its inception, as Saville and Bailey (1980)  
729 noted, '*the dividing line between VIa and the North Sea (sub-area IV) at 4°W longitude was not chosen*  
730 *on any criterion of herring stock differentiation but for convenience in statistics collection*'. Further,  
731 the current study has demonstrated that *6aS* herring may be found up to at least the 4°W line of  
732 longitude and Farrell *et al.* (2021) demonstrated the uncertainty in the composition of HERAS hauls in  
733 close proximity east of this line. The winter spawning Downs herring have also been shown to be a  
734 distinct and separate population to the North Sea autumn spawning herring and are relatively easily  
735 distinguished with the genetic markers in the current panel. The extent of the distribution of Downs  
736 herring in the North Sea area and their abundance in the HERAS or in the commercial catches in  
737 Divisions 4.a and 4.b are currently unknown. There are also known and demonstrated issues of mixing  
738 of the North Sea autumn spawning herring with Western Baltic herring to the east (Bekkevold *et al.*,  
739 In preparation) and with Norwegian Spring Spawning herring to the North (Berg *et al.*, 2017). What is  
740 required now is a cohesive effort to study all of these stock identification issues, and those in the  
741 current study, together rather than treating them all separately. The ideal scenario may be to develop  
742 a universal marker panel that can discriminate all of the populations that could potentially be surveyed

743 or caught in the Northeast Atlantic area (FAO Major Fishing Area 27). In theory this would solve some  
744 of the issues outlined above, it would, however, also create a cost-benefit issue relating to the use of  
745 more extensive and expensive panels. In order to differentiate a wider range of populations, including  
746 those in the Baltic Sea, the panel would certainly need to comprise a larger number of genetic markers.  
747 The markers that may be suitable for discriminating between some of the Baltic Sea populations would  
748 likely not be informative for the populations west of Ireland and Britain (see Han *et al.*, 2020).  
749 Therefore, using a universal panel of markers on a sample caught to the west of Ireland and Britain,  
750 which is highly unlikely to contain any Baltic herring, would represent a degree of wasted resources.  
751 If the universal panel was used on a sample caught in the eastern North Sea, then the presence of the  
752 Baltic markers may actually be beneficial as there is the potential for some Baltic Sea populations to  
753 be present in this area. The difficulty arises in defining the cut-off points on where the use of the  
754 universal panel is justified and where it is wasteful. Such a definition is akin to delineating stocks based  
755 on geographic or statistical areas such as ICES Divisions and inevitably introduces an element of  
756 subjectivity that may bias the results. It also introduces issues concerning the temporal stability of  
757 such definitions in an era of changing environmental conditions and documented changes in species  
758 distributions. Therefore, the use of a universal or specific marker panel is a topic that requires very  
759 careful consideration and rigorous empirical testing.

760 Implementation of a universal marker panel would also necessitate the development and  
761 implementation of a standard assignment approach across multiple jurisdictions. The use of the SVM  
762 model in *assignPOP* in the current study was favoured over traditional methods that rely on genotypic  
763 frequency distribution, as it was not constrained by underlying assumptions of HWE and linkage  
764 equilibrium. Further it enabled a transparent and reproducible approach that could be clearly  
765 understood by non-geneticists, which is important if genetic stock identification methods are to be  
766 accepted and widely implemented as part of standard fisheries data collection protocols. Though not  
767 used in the current study, *assignPOP* also allows for the use of non-genetic markers either as  
768 standalone assignment models or in combined models with genetic data. This option may be attractive

769 to institutes that have long time series of morphometric and meristic based stock identification data  
770 as the transition to genetic based methods can be made easier with direct comparison of the different  
771 data sets that are capable of being conducted within the same analyses.

772 The SNP panel deployed in the current study was composed of adaptive markers that are known to  
773 be under diversifying selection and proven to be associated with local ecological adaptation (Han *et al.*  
774 *et al.*, 2020; Martinez Barrio *et al.*, 2016). Genetic markers associated with loci under selection have been  
775 proven to provide better resolution to distinguish population structure in herring than neutral genetic  
776 markers (Bekkevold *et al.*, 2016; Han *et al.*, 2020). However, such high-graded adaptive markers may  
777 undergo more rapid changes in allele frequencies within populations than putatively neutral genetic  
778 markers, particularly in situations of dynamic environmental conditions (Jorde *et al.*, 2018; Nielsen *et al.*  
779 *et al.*, 2012). In the current study the contemporary baseline spawning samples collected from 2014 to  
780 2021 (seven spawning seasons) indicated temporal stability of the genetic markers within the different  
781 populations. Thus, these SNPs were appropriate for the purposes of stock identification in the current  
782 study. However, it is advisable to continue to collect and analyse baseline spawning samples regularly  
783 to monitor any changes in allele frequencies within the populations in the assignment model in order  
784 to prevent erroneous assignments of mixed samples. This also raises the question of how long to retain  
785 samples in the baseline dataset. As populations evolve and respond to changing conditions, older  
786 samples may become less relevant as baseline samples and may not represent the populations in their  
787 current state, which may have a negative impact on the assignments. Thus baseline samples should  
788 perhaps be limited to a time scale that is relevant to the current population e.g. the longevity of the  
789 species. Given the relatively short history of effective genetic stock identification this has not been an  
790 issue to date but should be considered now as genetic stock identification starts to become an  
791 important part of marine fish stock assessment.

792 To date there are few examples of genetic stock assignment being used for the regular assignment of  
793 survey or catch data of marine fish into population of origin for the purposes of stock assessment.



794 These methods have primarily been used for one off studies, that at best have been used to inform  
795 management but few have been developed for regular monitoring and data collection (Reiss *et al.*,  
796 2009; Waples *et al.*, 2008). Genetic stock identification methods have been most commonly used for  
797 salmonids, including Atlantic Salmon, *Salmo salar* (Gilbey *et al.*, 2016) and species of pacific salmon  
798 including coho salmon, *Oncorhynchus kisutch* (Beacham *et al.*, 2020). In these studies, self-assignment  
799 accuracies of 70-80% were concluded to be acceptable levels of accuracy. The high level of self-  
800 assignment accuracy in the current study (>90%) exceeds this and is maintained even in the event of  
801 a considerable number of missing genotypes per individual.

802 If implemented as part of regular data collection on the MSHAS, the genetic stock identification  
803 method in the current study will enable the splitting of the survey indices into their constituent  
804 Division 6.a populations, which has not previously been possible. As a result, it will be possible to  
805 develop a separate stock assessment for the Division 6.a.S, 7.b-c stock. Although, it should be noted  
806 that as there were no spawning herring observed or sampled in Divisions 7.b and 7.c, it was not  
807 possible to test the assumption that the herring that spawn in these Divisions are the same population  
808 as the 6aS herring. The apparent lack of differentiation between the 6aN\_Aut herring and the North  
809 Sea autumn spawning herring also raises the question of whether it is appropriate to conduct a stand-  
810 alone assessment on the 6aN\_Aut herring or whether it should be combined with the North Sea  
811 autumn spawning herring assessment, though it is beyond the remit of the current study to make this  
812 recommendation. What is clear is that the results of the current study have improved the capacity to  
813 delineate, survey and assess the herring stocks in Division 6.a and there is a need now to translate this  
814 into improved management.

815

816 **Data accessibility**

817 All data are provided in the manuscript and extra supplementary tables (ESM Table 1 – ESM Table 8)  
818 and figures (ESM Figure 1 – ESM Figure 4) are provided in the file  
819 *Farrell\_et\_al\_6a\_herring\_baseline\_ESM\_tables\_figures.xlsx*.

820

#### 821 **Research Ethics, Animal Ethics**

822 No ethical approval was required. All samples were collected opportunistically from fish caught during  
823 fisheries surveys and commercial fisheries. No fish were killed for the purpose of the study and no  
824 licences were required.

825

#### 826 **Competing interests**

827 We have no competing interests.

828

#### 829 **Author's contributions**

830 Conceptualisation: EDF, JC, MWC, SML, CN. Data Curation: EDF, SML, SM, CN, SO'C, MO'M, MP, EW.

831 Formal analysis: EDF, LA, DB, NC, JC, MWC, AE, AF, MG, SML, SM, CN, SO'C, MO'M, MP, MEP, EW.

832 Funding acquisition: EDF, NC, JC, MWC, SML, SM, CN, MP. Investigation: EDF, LA, DB, NC, JC, MWC,

833 AE, AF, MG, SML, SM, CN, SO'C, MO'M, MP, MEP, EW. Methodology: EDF, LA, DB, JC, AE, AF, MG,

834 SML, SM, CN, SO'C, MO'M, MP, MEP, EW. Project administration: EDF, NC, JC, MWC, MG, SML, SM,

835 CN, MP. Resources: EDF, LA, DB, MWC, SML, SM, CN, SO'C, MO'M, MP, MEP, EW. Validation: EDF,

836 LA, DB, NC, JC, MWC, AE, AF, MG, SML, SM, CN, SO'C, MO'M, MP, MEP, EW. Visualisation: EDF, EW.

837 Writing-original draft: EDF, EW. Writing-review & editing: EDF, LA, DB, NC, JC, MWC, AE, AF, MG,

838 SML, SM, CN, SO'C, MO'M, MP, MEP, EW.

839

#### 840 **Acknowledgements**

841 The work in the current study was part funded (2018-2020) by the European Commission’s Executive  
842 Agency for Small and Medium-sized Enterprises (EASME) under Service Contract  
843 EASME/EMFF/2017/1.3.2.1/SI2.767459. The authors would also like to thank the Killybegs  
844 Fishermen’s Organisation, Pelagic Freezer Trawler Association, Scottish Pelagic Fishermen’s  
845 Association, Marine Institute, Marine Scotland Science, Pelagic Advisory Council and the Northern  
846 Pelagic Working Group of the European Association of Fish Producers Organisations for continued  
847 financial and ancillary support throughout the duration of the project (2015-2022). We are also  
848 grateful to all the scientists and crew of the RVs ‘*Celtic Explorer*’, ‘*Scotia*’ and ‘*Corystes*’ and all of the  
849 commercial vessels and scientists that have helped with the collection of samples. We acknowledge  
850 the help and support provided by Kuan-Yu “Alex” Chen with the turning of the assignPOP model.  
851 Finally, we acknowledge the valuable contribution of the GENSINC project (GENetic adaptations  
852 underlying population Structure IN herring; Research Council of Norway project 254774), which  
853 identified the informative markers that made the current study possible.

854

## 855 **References**

- 856 Anderson, E.C. 2010. Assessing the power of informative subsets of loci for population assignment:  
857 standard methods are upwardly biased. *Molecular Ecology Resources*, 10: 701–710.
- 858 Anon, 2014. Proposal for a Council Regulation fixing for 2015 the fishing opportunities for certain fish  
859 stocks and groups of fish stocks, applicable in Union waters and, for Union vessels, in certain  
860 non-Union waters and repealing Council Regulation (EU) No 779/2014. European Commission,  
861 Brussels, 28.10.2014, COM.
- 862 Babraham, 2016. FastQC. (<http://www.bioinformatics.bbsrc.ac.uk/projects/fastqc>)
- 863 Baxter, I.G. 1958. The composition of the Minch herring stocks. *Rapports et procès-verbaux des*  
864 *réunions / Conseil permanent international pour l'exploration de la mer*, 143: 814-94.

- 865 Beacham, T.D, Wallace, C., Jonsen, K., McIntosh, B., Candy, J.R., Rondeau, E.B., Moore, J-S.,  
866 Bernatchez, L. and Withler, R.E. 2020. Accurate estimation of conservation unit contribution to  
867 coho salmon mixed-stock fisheries in British Columbia, Canada, using direct DNA sequencing for  
868 single nucleotide polymorphisms. *Canadian Journal of Fisheries and Aquatic Sciences*, 77: 1302–  
869 1315
- 870 Bekkevold, D., Berg, F., Polte, P., Bartolino, V., Ojaveer, H., Mosegaard, H., Farrell, E.D., Fedotova, E.,  
871 Hemmer-Hansen, J., Huwer, B., Trijoulet, V., Moesgaard Albertsen, C., Fuentes-Pardo, A.,  
872 Gröhsler, T., Petterson, M., Janssen, T., Andersson, L. and Folkvord, A. (In preparation). Genetic  
873 stock identification in Atlantic herring (*Clupea harengus*): implementation of new tools alters  
874 stock concepts and traces complex migration dynamics across multiple management areas.
- 875 Bekkevold, D., Gross, R., Arula, T., Helyar, S.J. and Ojaveer, H. 2016. Outlier loci detect intraspecific  
876 biodiversity amongst spring and autumn spawning herring across local scales. *PLoS ONE*11:  
877 e0148499.
- 878 Berg, F., Slotte, A., Johannessen, A., Kvamme, C., Clausen, L.W. and Nash, R.D.M. 2017. Comparative  
879 biology and population mixing among local, coastal and offshore Atlantic herring (*Clupea*  
880 *harengus*) in the North Sea, Skagerrak, Kattegat and western Baltic. *PLoS One* 12:e0187374, doi:  
881 10.1371/journal.pone.0187374.
- 882 Bernatchez, L. *et al.* 2017 Harnessing the Power of Genomics to Secure the Future of Seafood. *Trends*  
883 *in Ecology and Evolution*, 32: 665–680.
- 884 Cadrin S.X. & Secor D.H. 2009. Accounting for spatial population structure in stock assessment: past,  
885 present and future. In: Beamish R. J., Rothschild B. J., editors. *The Future of Fishery Science in*  
886 *North America*. Dordrecht: Springer. p. 405-425. 736 pp.
- 887 Campbell, N.R., Harmon, S.A. and Narum, S.R. 2015. Genotyping-in-Thousands by sequencing (GT-  
888 seq): A cost effective SNP genotyping method based on custom amplicon sequencing. *Molecular*  
889 *Ecology Resources*, 15: 855–867.

- 890 Casey, J., Jardim, E. and Martinsohn, J.T.H. 2016. The role of genetics in fisheries management under  
891 the E.U. common fisheries policy. *Journal of Fish Biology*, 89: 2755–2767.
- 892 Chen, K., Marshall, E.A., Sovic, M.G., Fries, A.C., Gibbs, H.L., Ludsin, S.A. 2018. assignPOP: An r package  
893 for population assignment using genetic, non-genetic, or integrated data in a machine-learning  
894 framework. *Methods in Ecology and Evolution*, 9: 439-446.
- 895 Cornuet, J.-M., Piry, S., Luikart, G., Estoup, A. and Solignac, M. 1999. New methods employing  
896 multilocus genotypes to select or exclude populations as origins of individuals. *Genetics*, 15:  
897 1989-2000.
- 898 Davey, J.W., Hohenlohe, P.A., Etter, P.D., Boone, J.Q., Catchen, J.M. and Blaxter, M.L. 2011. Genome-  
899 wide genetic marker discovery and genotyping using next-generation sequencing. *Nature*  
900 *Reviews Genetics*, 12: 499–510.
- 901 Dickey-Collas, M., Nash, R.D.M., Brunel, T., van Damme, C.J.G., Marshall, C.T., Payne, M.R., Corten, A.,  
902 *et al.* 2010 Lessons learned from stock collapse and recovery of North Sea herring: a review.  
903 *ICES Journal of Marine Science*, 67: 1875-1886.
- 904 Dieringer, D. and Schlötterer, C. 2003 Microsatellite Analyser (MSA): a platform independent analysis  
905 tool for large microsatellite data sets. *Molecular Ecology Resources*, 3: 167–169.
- 906 Farrell, E.D., Campbell, N., Carlsson, J., Egan, A., Gras, M., Lusseau, S.M., Nolan, C., O’Connell, S.,  
907 O’Malley, M., and White, E. 2021 Herring in Divisions 6.a, 7.b and 7.c: Scientific Assessment of  
908 the Identity of the Southern and Northern Stocks through Genetic and Morphometric Analysis.  
909 Service Contract EASME/EMFF/2017/1.3.2.1/SI2.767459. DOI: 10.2826/208498
- 910 Farrell, E.D., Carlsson, J.E.L. and Carlsson, J. 2016. Next Gen Pop Gen: implementing a high-throughput  
911 approach to population genetics in boarfish (*Capros aper*). *Royal Society Open Science*,  
912 3:160651.
- 913 Gilbey, J., Cauweiler, E., Coulson, M.W., Stradmeyer, L., Sampayo, J.N., Armstrog, A., Verspoor, E.,  
914 Corrigan, L. Shelley, J. and Middlemas, S. 2016. Accuracy of assignment of Atlantic Salmon

- 915 (Salmo salar L.) to rivers and regions in Scotland and Northeast England based on single  
916 nucleotide polymorphism (SNP) markers. PLoS ONE 11(10): e0164327.
- 917 Hatfield, E.M.C. *et al.*, 2005. (WESTHER, Q5RS-2002-01056): A multidisciplinary approach to the  
918 identification of herring (*Clupea harengus* L.) stock components west of the British Isles using  
919 biological tags and genetic markers. Final Report. 320pp.
- 920 Han, F., Jamsandekar, M., Pettersson, M.E., Su, L., Fuentes-Pardo, A., Davis, B., Bekkevold, D., Berg, F.,  
921 Cassini, M., Dahle, G., Farrell, E.D., Folkvord, A. and Andersson, L. (2020). Ecological adaptation  
922 in Atlantic herring is associated with large shifts in allele frequencies at hundreds of loci. *eLife*,  
923 2020;9:e61076 (DOI: 10.7554/eLife.61076)
- 924 Heath, M. 1989. Transport of larval herring (*Clupea harengus* L.) by the Scottish Coastal Current.  
925 Rapports et procès-verbaux des réunions / Conseil permanent international pour l'exploration  
926 de la mer, 191: 85-91.
- 927 Heath, M. 1990. Segregation of herring larvae from inshore and offshore spawning grounds in the  
928 north-western North Sea – Implications for stock structure. *Netherlands Journal of Sea*  
929 *Research*, 25: 267-278.
- 930 Heath, M.R., MacLachlan, P.M. and Martin, J.H. A. 1987. Inshore circulation and transport of herring  
931 larvae off the north coast of Scotland. *Marine Ecology Progress Series*, 40: 11-23, 1987
- 932 Hemmer-Hansen, J., Therkildsen, N.O. and Pujolar, J.M. 2014. Population genomics of marine fishes:  
933 Next-generation prospects and challenges. *The Biological Bulletin*, 227: 117-132.
- 934 Hintzen, N.T., Roel, B., Benden, D., Clarke, M., Egan, A., Nash, R.D.M., Rohlf, N. & Hatfield, E.M.C. 2015.  
935 Managing a complex population structure: exploring the importance of information from  
936 fisheries-independent sources. *ICES Journal of Marine Science*, 72: 528-542.
- 937 ICES, 1982. Report of the Herring Assessment Working Group for the Area South of 62°N (HAWG).  
938 ICES CM 1982/Assess:7, 132 pp.
- 939 ICES, 2011. Report of the Workshop on Sexual Maturity Staging of Herring and Sprat (WKMSHS), 20-  
940 23 June 2011, Charlottenlund, Denmark. ICES CM 2011/ACOM:46. 143pp.

- 941 ICES, 2014. Report of the Herring Assessment Working Group for the Area South of 62°N (HAWG), 11-  
942 20 March 2014, ICES HQ, Copenhagen, Denmark. ICES CM 2014/ACOM:06. 1257 pp.
- 943 ICES, 2015. Report of the Benchmark Workshop on West of Scotland herring (WKWEST 2015). 2–6  
944 February 2015, Marine Institute, Dublin, Ireland.
- 945 James, G., Witten, D., Hastie, T. and Tibshirani, T. 2013. An introduction to statistical learning, volume  
946 112. Springer, 2013.
- 947 Jombart, T. 2008. adegenet: a R package for the multivariate analysis of genetic markers.  
948 *Bioinformatics*, 24: 1403-1405.
- 949 Jombart, T., Pontier, D and Dufour, A-B. 2009. Genetic markers in the playground of multivariate  
950 analysis. *Heredity*, 102: 330-341.
- 951 Jombart, T., Devillard, S. and Balloux, F. 2010. Discriminant analysis of principal components: a new  
952 method for the analysis of genetically structured populations. *BMC Genetics*, 11: 94
- 953 Jorde, P.E., Synnes, A-E., Espeland, S.H., Sodeland, M. and Knutsen, H. 2018. Can we rely on selected  
954 genetic markers for population identification? Evidence from coastal Atlantic cod. *Ecology and*  
955 *Evolution*, 8:12547-12558.
- 956 Kaplinski, L., Andreson, R., Puurand, T., Remm, M. 2005 MultiPLX: automatic grouping and evaluation  
957 of PCR primers. *Bioinformatics*, 21: 1701-1702.
- 958 Kearse, M., Moir, R., Wilson, A., Stones-Havas, S., Cheung, M., Sturrock, S., Buxton, S., Cooper, A.,  
959 Markowitz, S., Duran, C., Thierer, T., Ashton, B., Mentjies, P. and Drummond, A. 2012. Geneious  
960 Basic: an integrated and extendable desktop software platform for the organization and analysis  
961 of sequence data. *Bioinformatics*, 28: 1647-1649.
- 962 Kerr, L.A., Hintzen, N.T., Cadrin, S.X., Worsøe Clausen, L., Dickey-Collas, M., Goethel, D.R., Hatfield,  
963 E.M.C., Kritzer, J.P., & Nash, R.D.M. 2016. Lessons learned from practical approaches to  
964 reconcile mismatches between biological population structure and stock units of marine fish.  
965 *ICES Journal of Marine Science*, 74: 1708–1722.

- 966 Lamichhaney, S., Martinez Barrio, A., Rafati, N., Sundström, G., Rubin, C.-J., *et al.*, 2012. Population-  
967 scale sequencing reveals genetic differentiation due to local adaptation in Atlantic herring.  
968 PNAS, 109: 19345–19350.
- 969 MacKenzie, K. 1985 The use of parasites as biological tags in population studies of herring (*Clupea*  
970 *harengus* L.) in the North Sea and to the north and west of Scotland. ICES Journal of Marine  
971 Science, 42: 33-64.
- 972 Mackinson, S., Pastoors, M., O’Connell, S., Berges, B., Forbes-Birnie, J., McAulay, S., Brigden, K., Fraser,  
973 S., O’Malley, M., Farrell, E.D. 2021. The 2020 industry-science survey of herring in the Western  
974 British Isles (ICES div 6a, 7bc). 122 pp
- 975 Mackinson, S., Pastoors, M., Lusseau, S., O’Connell, S., Forbes-Birnie, J., Sakinan, S., Berges, B., Brigden,  
976 K., O’Malley, M., Farrell, E.D. 2019a. The 2019 industry-science survey of herring in the Western  
977 British Isles (ICES div 6a, 7bc). 96pp
- 978 Mackinson, S., Pastoors, M., Lusseau, S., Armstrong, E., O’Connell, S., Sakinan, S., Berges, B., McClean,  
979 A., Langlands, B., Wiseman, A., O’Malley, M., Farrell, E.D. 2019b. The 2018 industry-science  
980 survey of herring in the Western British Isles (ICES div 6a, 7bc). 99pp
- 981 Manel, S., Gaggioti, O.E., Waples, R.S. 2005. Assignment methods: matching biological questions with  
982 appropriate techniques. *Trends in Ecology and Evolution*, 20: 136–142.
- 983 Mariani, S., and Bekkevold, D. 2013. The nuclear genome: neutral and adaptive markers in fisheries  
984 science. In *Stock Identification Methods*, 2nd edn, pp. 397–428. Ed. by S. X. Cadrin, L. A. Kerr,  
985 and S. Mariani. Elsevier, San Diego. 566 pp.
- 986 Martinez Barrio, A., Lamichhaney, S., Fan, G., Rafati, N., Pettersson, M., Zhang, H., Dainat, J., Ekman,  
987 D., Höppner, M., Jern, P., Martin, M., Nystedt, B., Liu, X., Chen, W., Liang, X., Shi, C., Fu, Y., Ma,  
988 K., Zhan, X., Feng, C., Gustafson, U., Rubin, C.J., Sällman Almén, M., Blass, M., Casini, M.,  
989 Folkvord, A., Laikre, L., Ryman, N., Ming-Yuen, Lee S., Xu, X., Andersson, L. 2016 The genetic  
990 basis for ecological adaptation of the Atlantic herring revealed by genome sequencing. *eLife*,  
991 5:12081.



- 992 McQuinn, I.H. 1997. Metapopulations and the Atlantic herring. *Reviews in Fish Biology and Fisheries*,  
993 7: 297–329.
- 994 Meyer, D., Dimitriadou, E., Hornik, K., Weingessel, A., Leisch, F., Chang, C.-C., and Lin, C.-C. 2015.  
995 e1071: Misc Functions of the Department of Statistics, Probability Theory Group (Formerly:  
996 E1071). TU Wien.
- 997 Nielsen, E. E., A. Cariani, E. Aoidh, G. E. Maes, I. Milano, R. Ogden, M. Taylor *et al.* 2012. Gene-  
998 associated markers provide tools for tackling illegal fishing and false eco-certification. *Nature*  
999 *Communications*, 3: 851.
- 1000 Paetkau, D., Calvert, W., Stirling, I. and Strobeck C. 1995. Microsatellite analysis of population  
1001 structure in Canadian polar bears. *Molecular Ecology*, 4: 347-354.
- 1002 Peakall, R. and Smouse P.E. 2012. GenAlEx 6.5: genetic analysis in Excel. Population genetic software  
1003 for teaching and research-an update. *Bioinformatics* 28, 2537-2539.
- 1004 Pettersson, M.E., Rochus, C.M., Han, F., Chen, J., Hill, J., Wallerman, O., Fan, G., Hong, X., Xu, Q., Zhang,  
1005 H., Liu, S., Liu, X., Haggerty, L., Hunt, T., Martin, F.J., Flicek, P., Bunikis, I., Folkvord, A. and  
1006 Andersson L. 2019. A chromosome-level assembly of the Atlantic herring genome-detection of  
1007 a supergene and other signals of selection. *Genome Research*, 29: 1919-1928.
- 1008 Piry, S., Alapetite, A., Cornuet, J-M., Paetkau, D., Baudouin, L., Estoup, A. 2004. geneClass2: a software  
1009 for genetic assignment and first-generation migrant detection. *Journal of Heredity*, 95: 536–  
1010 539.
- 1011 Pritchard, J.K, Stephens, M. and Donnelly, P. 2000. Inference of population structure using multilocus  
1012 genotype data. *Genetics*. 155, 945–959.
- 1013 Rannala, B. and J. L. Mountain. 1997. Detecting immigration by using multilocus genotypes. *Proc. Natl.*  
1014 *Acad. Sci. USA* 94: 9197-9221.
- 1015 Reiss, H., Hoarau G., Dickey-Collas M. & Wolff, W. J. 2009. Genetic population structure of marine fish:  
1016 mismatch between biological and fisheries management units. *Fish and Fisheries*, 10: 361–395.
- 1017 Rice, W.R. 1989 Analyzing tables of statistical tests. *Evolution*. 43, 223–225.

- 1018 Rousset, F. 2008 Genepop'007: a complete reimplementa-tion of the Genepop software for Windows  
1019 and Linux. *Molecular Ecology Resources*, 8: 103-106.
- 1020 Rozen, S. and Skaletsky, H. 2000 Primer3 on the WWW for general users and for biologist  
1021 programmers. *Methods in Molecular Biology*, 132: 365–386.
- 1022 Saville, A. 1970. The stock fished by the Scottish herring fishery to the west of Scotland. ICES Pelagic  
1023 Fish (Northern) Committee, CM19/H: 29
- 1024 Saville, A. and Morrison, J.A. 1973. A reassessment of the herring stock to the west of Scotland. ICES  
1025 Pelagic Fish (Northern) Committee, CM 1973/H:24.
- 1026 Saville, A. and Bailey, R.S. 1980. The assessment and management of the herring stocks in the North  
1027 Sea and to the west of Scotland. *Rapport et Proces-Verbaux des Reunions*, 177: 7-36.
- 1028 Schrider, D.R. and Kern, A.D. 2018. Supervised machine learning for population genetics: a new  
1029 paradigm. *Trends in Genetics*, 34:301-312.
- 1030 Simmonds, E.J. 2009. Evaluation of the quality of the North Sea herring assessment. *ICES Journal of*  
1031 *Marine Science*, 66: 1814–1822.
- 1032 Stephenson, R.L. 2002. Stock structure management and structure: an ongoing challenge for ICES. *ICES*  
1033 *Marine Science Symposium*, 215: 305-314.
- 1034 Vartia, S., Villanueva, J.L., Finarelli, J., Farrell, E.D., Collins, P.C., Hughes, G., Carlsson, J.E.L., Gauthier,  
1035 D.T., McGinnity, P., Cross, T.F., FitzGerald, R.D., Mirimin, L., Cotter, P. and Carlsson, J. 2016. A  
1036 novel method of microsatellite genotyping-by-sequencing using individual combinatorial  
1037 barcoding. *Royal Society Open Science*, 3:150565
- 1038 Waples, R.S., Punt, A.E. and Cope, J.M. 2008. Integrating genetic data into management of marine  
1039 resources: how can we do better? *Fish and Fisheries*, 9: 423–449.
- 1040

1041 Table 1. Pairwise multi-locus  $F_{ST}$  (above the diagonal) for the *baseline dataset* and associated  $P$ -  
 1042 values (below the diagonal) with the temporal replicates condensed.

|         | 6aS    | CS     | IS     | 6aN_Aut | 6aN_Sp | NS     | DWN  |
|---------|--------|--------|--------|---------|--------|--------|------|
| 6aS     |        | 0.09   | 0.13   | 0.20    | 0.35   | 0.24   | 0.12 |
| CS      | 0.0001 |        | 0.08   | 0.23    | 0.64   | 0.32   | 0.01 |
| IS      | 0.0001 | 0.0001 |        | 0.20    | 0.67   | 0.29   | 0.08 |
| 6aN_Aut | 0.0001 | 0.0001 | 0.0001 |         | 0.57   | 0.02   | 0.24 |
| 6aN_Sp  | 0.0001 | 0.0001 | 0.0001 | 0.0001  |        | 0.60   | 0.68 |
| NS      | 0.0001 | 0.0001 | 0.0001 | 0.0001  | 0.0001 |        | 0.33 |
| DWN     | 0.0001 | 0.0001 | 0.0001 | 0.0001  | 0.0001 | 0.0001 |      |

1043

1044 Table 2. Clustering analyses, using the *find.clusters* function in *adeget*, of the *6a baseline dataset*.  
 1045 The percentage of each population group split by cluster and the percentage of each cluster split by  
 1046 population are shown.

| <b>Populations by Cluster</b> |              |          |            |
|-------------------------------|--------------|----------|------------|
|                               | <b>1+3+5</b> | <b>2</b> | <b>4+6</b> |
| <b>6aS</b>                    | 3.5          | 13.8     | 82.7       |
| <b>6aN_Aut</b>                | 93.6         | 0.4      | 6.0        |
| <b>6aN_Sp</b>                 | 2.0          | 95.1     | 2.9        |

  

| <b>Clusters by Population</b> |              |          |            |
|-------------------------------|--------------|----------|------------|
|                               | <b>1+3+5</b> | <b>2</b> | <b>4+6</b> |
| <b>6aS</b>                    | 2.3          | 53.6     | 89.4       |
| <b>6aN_Aut</b>                | 97.5         | 2.3      | 10.5       |
| <b>6aN_Sp</b>                 | 0.2          | 44.1     | 0.4        |

1047

1048

Table 3. Monte-Carlo and K-fold cross validation results from the assignPOP analyses of the two assignment approaches.

| Approach | Level | Method | Proportion<br>Loci | Training<br>individuals | K  | Origin                                      | Baseline<br>samples | Assignment group membership<br>probability $\pm$ SD |                 |
|----------|-------|--------|--------------------|-------------------------|----|---------------------------------------------|---------------------|-----------------------------------------------------|-----------------|
|          |       |        |                    |                         |    |                                             |                     | 6aS/6aN_Sp                                          | 6aN_Aut         |
| 1        | 1     | MC     | 1                  | 800                     | -  | 6aS/6aN_Sp                                  | 956                 | 0.94 $\pm$ 0.02                                     | 0.06 $\pm$ 0.02 |
|          |       |        |                    |                         |    | 6aN_Aut                                     | 1360                | 0.08 $\pm$ 0.01                                     | 0.92 $\pm$ 0.01 |
| 1        | 1     | K-fold | 1                  | -                       | 10 | 6aS/6aN_Sp                                  | 956                 | 0.93 $\pm$ 0.03                                     | 0.07 $\pm$ 0.03 |
|          |       |        |                    |                         |    | 6aN_Aut                                     | 1360                | 0.06 $\pm$ 0.03                                     | 0.94 $\pm$ 0.03 |
| 1        | 2     | MC     | 1                  | 75                      | -  | 6aS                                         | 854                 | 0.86 $\pm$ 0.01                                     | 0.14 $\pm$ 0.01 |
|          |       |        |                    |                         |    | 6aN_Sp                                      | 102                 | 0.06 $\pm$ 0.04                                     | 0.94 $\pm$ 0.04 |
| 1        | 2     | K-fold | 1                  | -                       | 10 | 6aS                                         | 854                 | 0.96 $\pm$ 0.02                                     | 0.04 $\pm$ 0.02 |
|          |       |        |                    |                         |    | 6aN_Sp                                      | 102                 | 0.53 $\pm$ 0.11                                     | 0.47 $\pm$ 0.11 |
| 2        | 1     | MC     | 1                  | 800                     | -  | 6aS/6aN_Sp <sup>A2L1</sup> (Clusters_2+4+6) | 1011                | 0.96 $\pm$ 0.01                                     | 0.04 $\pm$ 0.01 |
|          |       |        |                    |                         |    | 6aN_Aut <sup>A2</sup> (Clusters_1+3+5)      | 1305                | 0.04 $\pm$ 0.01                                     | 0.96 $\pm$ 0.01 |
| 2        | 1     | K-fold | 1                  | -                       | 10 | 6aS/6aN_Sp <sup>A2L1</sup> (Clusters_2+4+6) | 1011                | 0.95 $\pm$ 0.02                                     | 0.05 $\pm$ 0.02 |
|          |       |        |                    |                         |    | 6aN_Aut <sup>A2</sup> (Clusters_1+3+5)      | 1305                | 0.03 $\pm$ 0.01                                     | 0.97 $\pm$ 0.01 |
| 2        | 2     | MC     | 1                  | 200                     | -  | 6aS <sup>A2L2</sup> (Clusters_4+6)          | 791                 | 0.99 $\pm$ 0.00                                     | 0.01 $\pm$ 0.00 |
|          |       |        |                    |                         |    | 6aS/6aN_Sp <sup>A2L2</sup> (Cluster_2)      | 220                 | 0.00 $\pm$ 0.00                                     | 1.00 $\pm$ 0.00 |
| 2        | 2     | K-fold | 1                  | -                       | 10 | 6aS <sup>A2L2</sup> (Clusters_4+6)          | 791                 | 1.00 $\pm$ 0.00                                     | 0.00 $\pm$ 0.00 |
|          |       |        |                    |                         |    | 6aS/6aN_Sp <sup>A2L2</sup> (Cluster_2)      | 220                 | 0.01 $\pm$ 0.02                                     | 0.99 $\pm$ 0.02 |

1051

Table 4. Assignment decision table, indicating the assignment steps in relation to the assignment threshold probability ( $P$ ).

| Approach | Level | Assigned Group                              | $P$         | Action          | Final assignment           |
|----------|-------|---------------------------------------------|-------------|-----------------|----------------------------|
| 1        | 1     | 6aN_Aut                                     | $\geq 0.67$ | Assigned        | 6aN_Aut                    |
| 1        | 1     | 6aS/6aN_Sp                                  | $\geq 0.67$ | Move to level 2 | -                          |
| 1        | 1     | 6aN_Aut                                     | $< 0.67$    | Not assigned    | NA                         |
| 1        | 1     | 6aS/6aN_Sp                                  | $< 0.67$    | Not assigned    | NA                         |
| 1        | 2     | 6aS                                         | $\geq 0.67$ | Assigned        | 6aS                        |
| 1        | 2     | 6aN_Sp                                      | $\geq 0.67$ | Assigned        | 6aN_Sp                     |
| 1        | 2     | 6aS                                         | $< 0.67$    | Not assigned    | 6aS/6aN_Sp                 |
| 1        | 2     | 6aN_Sp                                      | $< 0.67$    | Not assigned    | 6aS/6aN_Sp                 |
| 2        | 1     | 6aN_Aut <sup>A2</sup> (Clusters_1+3+5)      | $\geq 0.67$ | Assigned        | 6aN_Aut <sup>A2</sup>      |
| 2        | 1     | 6aS/6aN_Sp <sup>A2L1</sup> (Clusters_2+4+6) | $\geq 0.67$ | Move to level 2 | -                          |
| 2        | 1     | 6aN_Aut <sup>A2</sup> (Clusters_1+3+5)      | $< 0.67$    | Not assigned    | NA                         |
| 2        | 1     | 6aS/6aN_Sp <sup>A2L1</sup> (Clusters_2+4+6) | $< 0.67$    | Not assigned    | NA                         |
| 2        | 2     | 6aS <sup>A2L2</sup> (Clusters_4+6)          | $\geq 0.67$ | Assigned        | 6aS <sup>A2L2</sup>        |
| 2        | 2     | 6aS/6aN_Sp <sup>A2L2</sup> (Cluster_2)      | $\geq 0.67$ | Assigned        | 6aS/6aN_Sp <sup>A2L2</sup> |
| 2        | 2     | 6aS <sup>A2L2</sup> (Clusters_4+6)          | $< 0.67$    | Not assigned    | 6aS/6aN_Sp <sup>A2L1</sup> |
| 2        | 2     | 6aS/6aN_Sp <sup>A2L2</sup> (Cluster_2)      | $< 0.67$    | Not assigned    | 6aS/6aN_Sp <sup>A2L1</sup> |

1052

1053

1054 Table 5. The average proportion of non-baseline and WESTHER samples falling below a range of assignment thresholds for the *Approach 1-Level 1* and 2 and  
 1055 *Approach 2-Level 1* and 2 assignments. The individual sample proportions are in ESM Table 8.

| Type         | No. samples | No. individuals | Approach | ≤0.67   |         | ≤0.7    |         | ≤0.8    |         | ≤0.9    |         |
|--------------|-------------|-----------------|----------|---------|---------|---------|---------|---------|---------|---------|---------|
|              |             |                 |          | Level 1 | Level 2 | Level 1 | Level 2 | Level 1 | Level 2 | Level 1 | Level 2 |
| non-baseline | 28          | 1514            | 1        | 0.03    | 0.16    | 0.04    | 0.19    | 0.06    | 0.25    | 0.11    | 0.28    |
|              |             |                 | 2        | 0.02    | 0.00    | 0.02    | 0.00    | 0.04    | 0.01    | 0.08    | 0.01    |
| WESTHER      | 5           | 270             | 1        | 0.03    | 0.07    | 0.03    | 0.08    | 0.05    | 0.12    | 0.09    | 0.13    |
|              |             |                 | 2        | 0.01    | 0.00    | 0.02    | 0.00    | 0.03    | 0.00    | 0.06    | 0.00    |

1056

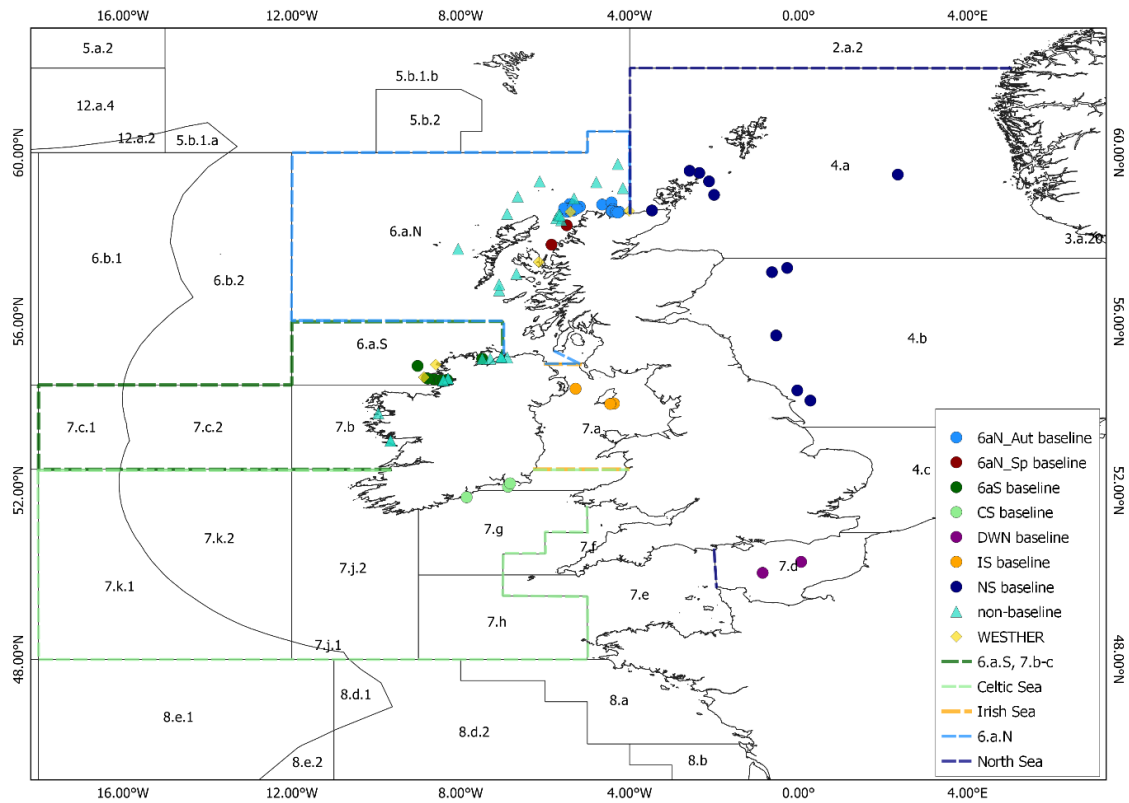

Figure 1. The distribution of herring samples collected and analysed in the current study. The sample type and current stock boundaries are indicated according to the legend.

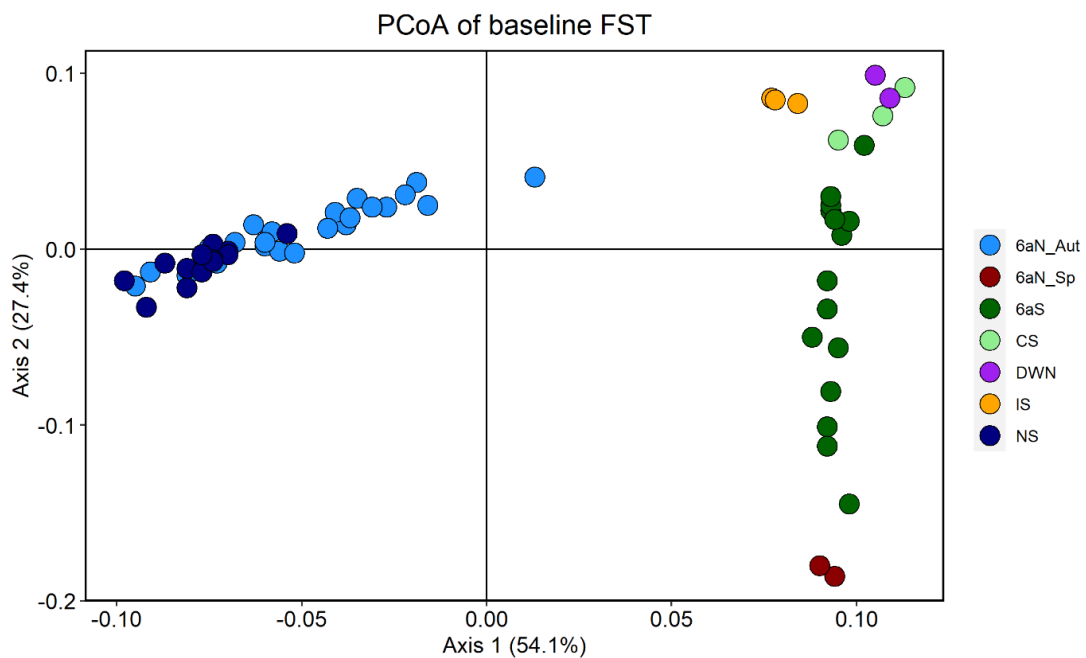

Figure 2. Principal Coordinate Analyses (PCoA) of the multi-locus pairwise  $F_{ST}$  analyses of the baseline samples.

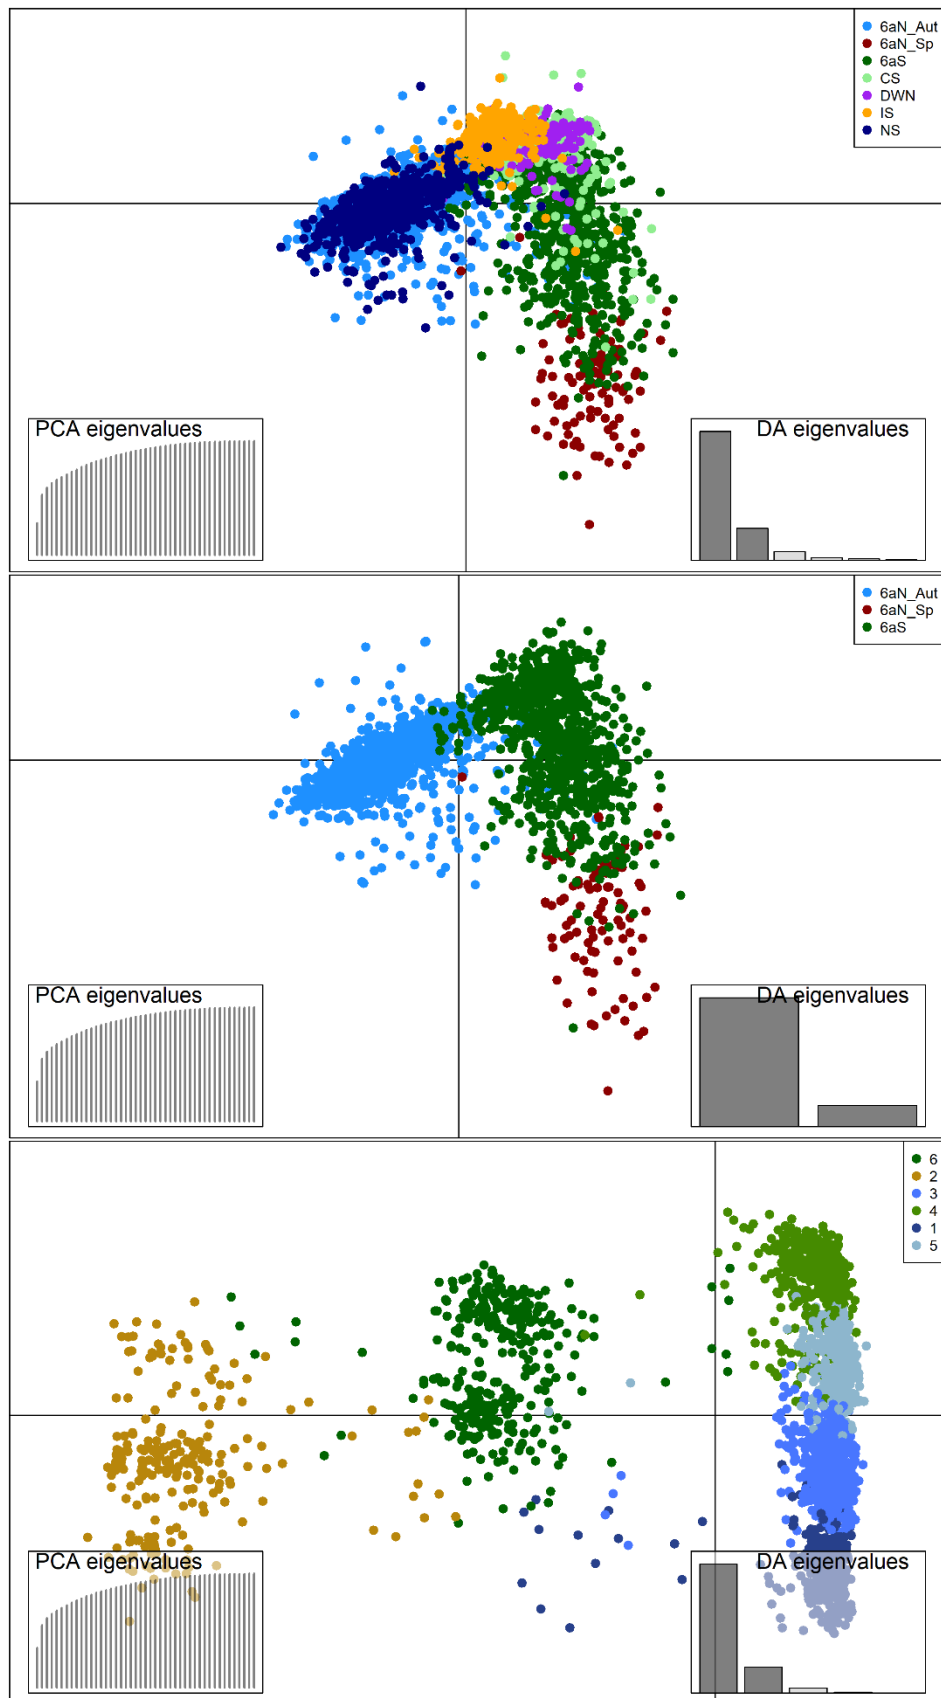

Figure 3. Discriminant Analysis of Principal Components (DAPC) of (top) the pooled *baseline* dataset (middle) the *6a baseline* dataset (bottom) the clustered *6a baseline* dataset.



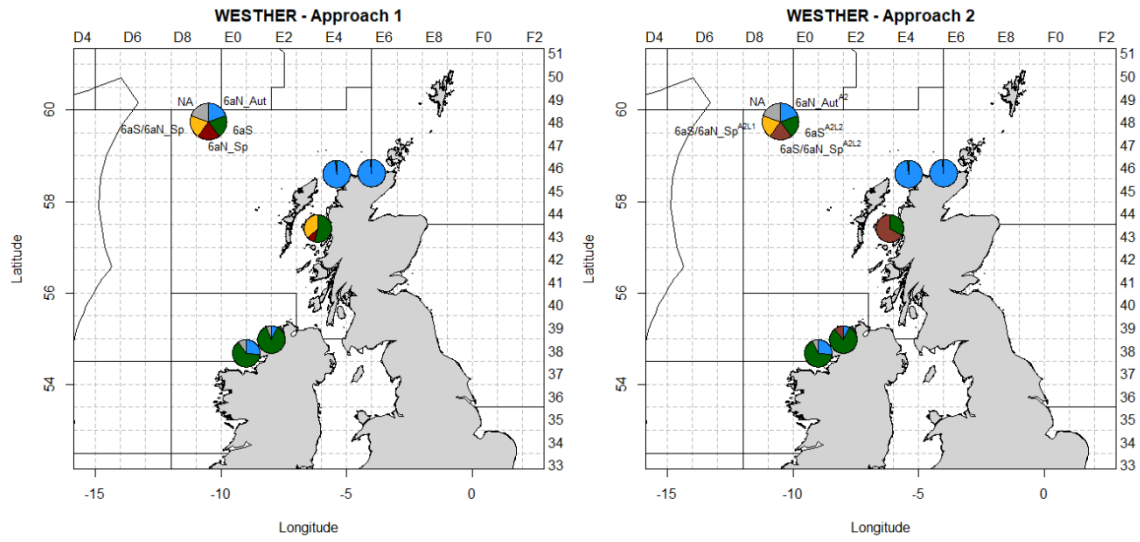

Figure 4. Assignment output of the archive samples from the WESTHER project following (left) Approach 1 and (right) Approach 2.

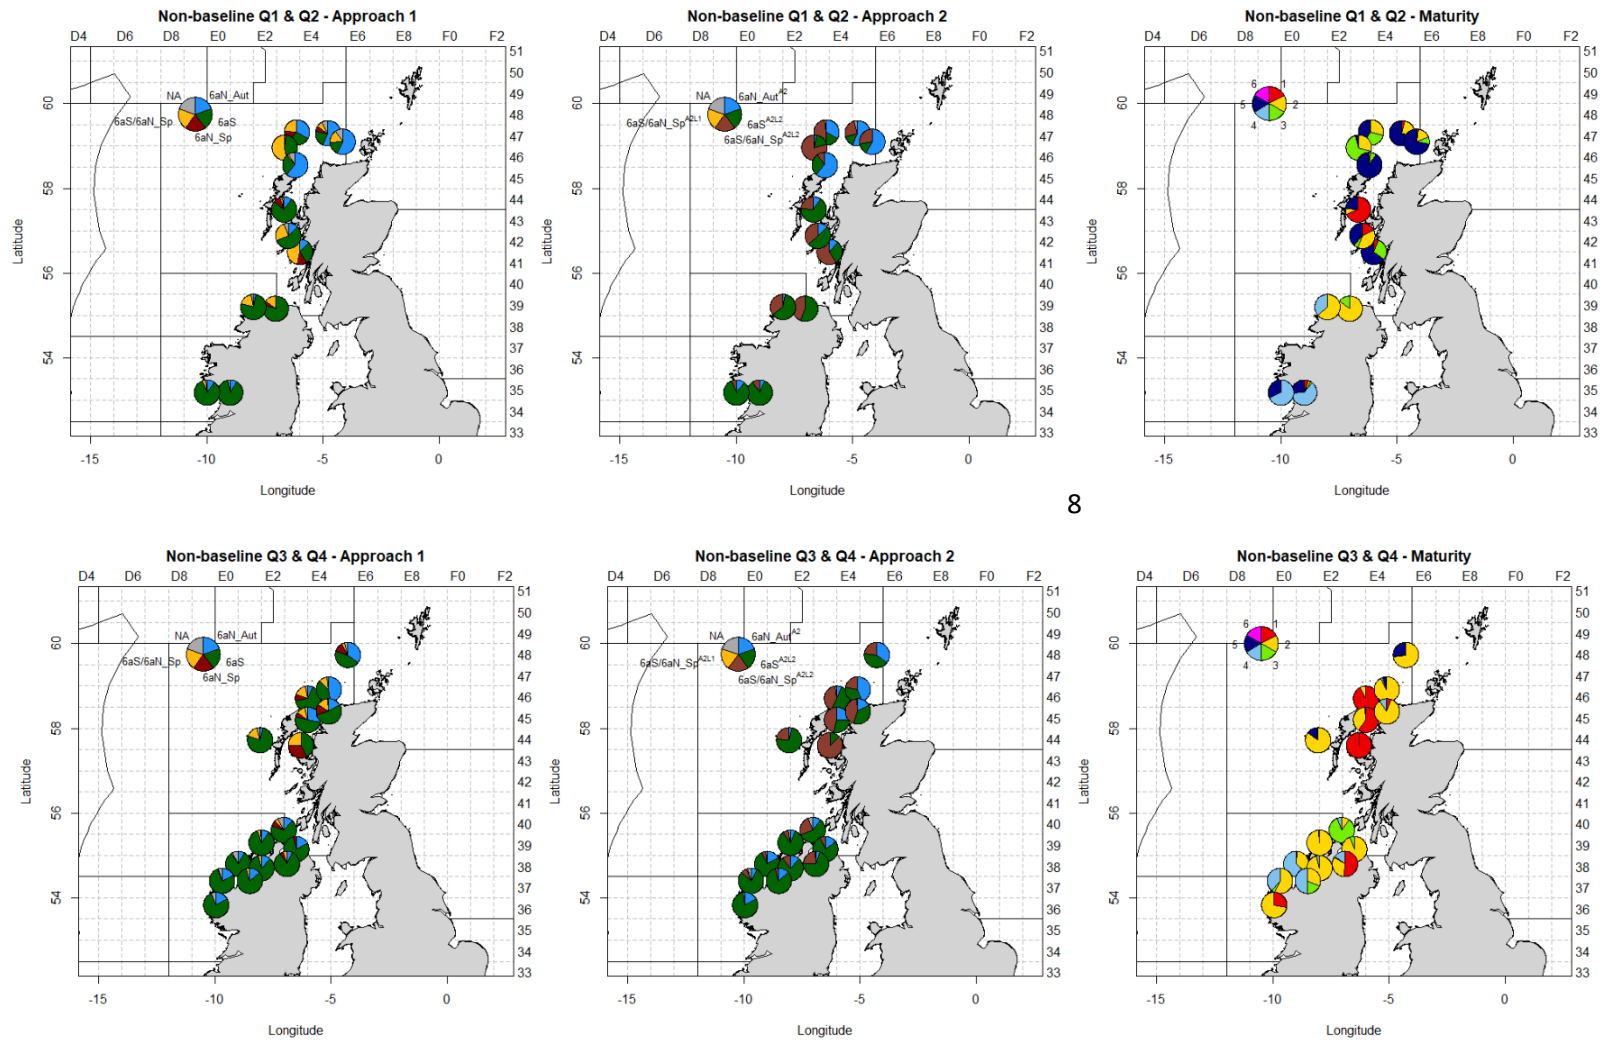

8

Figure 5. The assignment outputs and maturity stages of the contemporary non-baseline samples divided by quarter. Note the exact catch positions have been adjusted to minimise the overlap of the pie charts.
